# Supplementary material for: Elevational surveys of Sulawesi herpetofauna 2: Mount Katopasa on the Eastern Peninsula of Sulawesi island, Indonesia
Source: PeerJ. 2025 Sep 25;13:e20024. doi: 10.7717/peerj.20024 (PMC12476859; doi:10.7717/peerj.20024)
Supplement: Supplemental Information 2 [file peerj-13-20024-s002.xlsx]

## Sheet: Sheet1
Flag	JAM Number	MVZ (M) or MZB (B)	Genus species	Sex	Gravid?	Age Class	Collection Date	Time (START)	Time (END) (or NA)	SVL (mm)	Tail (mm)	Weight (g)	Latitude	Longitude	Uncertainty	Elevation	Habitat	Higher Geography	Specific Geography	Verbatim Locality	Collectors	Comments	Known Other Tissues
	15201	B	Eutropis multifasciata	female		Adult	2017-08-14	19:00:00		91	161	22.06	-1.13229	121.438	3	381	Coconut Kebun; away from stream			Gunung Katopasa Low Camp, Kecamatan Ulu Bonkga, Kabupaten Tojo Una-Una, Provinsi Sulawesi Tengah, Sulawesi Id., Indonesia	Jimmy McGuire; Jeff Frederick; Benjamin Karin; A. Hamidy; A. Riyanto
	15202	M	Limnonectes sp. "I"				2017-08-14	21:12:00		85		44.3	-1.12628	121.458	3	261	Secondary forest; in 1.5m wide rocky stream amongst rocks			Gunung Katopasa Low Camp, Kecamatan Ulu Bonkga, Kabupaten Tojo Una-Una, Provinsi Sulawesi Tengah, Sulawesi Id., Indonesia	Jimmy McGuire; Jeff Frederick; Benjamin Karin; A. Hamidy; A. Riyanto
	15203	B	Limnonectes sp. "I"				2017-08-14	22:25:00		91		56.21	-1.12813	121.449	3	262	Secondary forest; on rock 0.3m from 1.5m wide stream off 10m wide rocky river			Gunung Katopasa Low Camp, Kecamatan Ulu Bonkga, Kabupaten Tojo Una-Una, Provinsi Sulawesi Tengah, Sulawesi Id., Indonesia	Jimmy McGuire; Jeff Frederick; Benjamin Karin; A. Hamidy; A. Riyanto
	15204	B	Cyrtodactylus sp.	female			2017-08-14	22:41:00		55	48	2.6	-1.12896	121.447	3	282	Secondary forest; on 1.5m diameter dead tree trunk 15m from 10m wide stream			Gunung Katopasa Low Camp, Kecamatan Ulu Bonkga, Kabupaten Tojo Una-Una, Provinsi Sulawesi Tengah, Sulawesi Id., Indonesia	Jimmy McGuire; Jeff Frederick; Benjamin Karin; A. Hamidy; A. Riyanto
	15205	B	Ahaetulla prasina				2017-08-14	23:20:00		685	425	25.98	-1.13026	121.444	3	293	Secondary forest; 2m up on twiggy dry vegetation			Gunung Katopasa Low Camp, Kecamatan Ulu Bonkga, Kabupaten Tojo Una-Una, Provinsi Sulawesi Tengah, Sulawesi Id., Indonesia	Jimmy McGuire; Jeff Frederick; Benjamin Karin; A. Hamidy; A. Riyanto
	15206	B	Limnonectes sp. "G2"				2017-08-14	23:57:00		48		9.11	-1.1317	121.441	6	320	Secondary forest; on trail 8m from large stream			Gunung Katopasa Low Camp, Kecamatan Ulu Bonkga, Kabupaten Tojo Una-Una, Provinsi Sulawesi Tengah, Sulawesi Id., Indonesia	Jimmy McGuire; Jeff Frederick; Benjamin Karin; A. Hamidy; A. Riyanto
	15207	M	Sphenomorphus variegatus	female	Y	Adult	2017-08-15	05:15:00		53	81	3.19	-1.13221	121.438	7	365	Secondary forest; on ground in bamboo patch			Gunung Katopasa Low Camp, Kecamatan Ulu Bonkga, Kabupaten Tojo Una-Una, Provinsi Sulawesi Tengah, Sulawesi Id., Indonesia	Jimmy McGuire; Jeff Frederick; Benjamin Karin; A. Hamidy; A. Riyanto
	15208	B	Eutropis rudis	male			2017-08-15	12:15:00		88	125	20.04	-1.13193	121.439	10	352	Secondary forest; on small log in grassy clearing 1m from trail			Gunung Katopasa Low Camp, Kecamatan Ulu Bonkga, Kabupaten Tojo Una-Una, Provinsi Sulawesi Tengah, Sulawesi Id., Indonesia	Jimmy McGuire; Jeff Frederick; Benjamin Karin; A. Hamidy; A. Riyanto	Throat with blue wash on heavy black spotting. Dorsum uniform coppery with diffuse dark lateral stripe. Yellowish more laterally. Ben photo
	15209	B	Draco beccarii	male			2017-08-15	14:50:00		68	131	3.73	-1.13221	121.438	10	365	Selectively logged forest; 4m up 6" trunk, 24" bh in exposed light (cloudy)			Gunung Katopasa Low Camp, Kecamatan Ulu Bonkga, Kabupaten Tojo Una-Una, Provinsi Sulawesi Tengah, Sulawesi Id., Indonesia	Jimmy McGuire; Jeff Frederick; Benjamin Karin; A. Hamidy; A. Riyanto	Draco male. Dewlap orange. Dorsal and ventral patagium vivid yellow
	15210	M	Lipinia infralineolata				2017-08-15	14:55:00		41	57	1.24	-1.13082	121.442	6	331	Selectively logged forest; on trunk of 6" tree (DSH) 6" above ground, facing down			Gunung Katopasa Low Camp, Kecamatan Ulu Bonkga, Kabupaten Tojo Una-Una, Provinsi Sulawesi Tengah, Sulawesi Id., Indonesia	Jimmy McGuire; Jeff Frederick; Benjamin Karin; A. Hamidy; A. Riyanto
	15211	B	Dibamus sp.				2017-08-15	15:15:00		142	17	1.62	-1.12983	121.444	5	301	Selectively logged forest; found by digging under roots 7m from stream, 10-15cm under ground			Gunung Katopasa Low Camp, Kecamatan Ulu Bonkga, Kabupaten Tojo Una-Una, Provinsi Sulawesi Tengah, Sulawesi Id., Indonesia	Jimmy McGuire; Jeff Frederick; Benjamin Karin; A. Hamidy; A. Riyanto
	15212	M	Sphenomorphus tropidonotus				2017-08-15	16:16:00		35	5	1.09	-1.13793	121.444	8	391	Selectively logged forest; on 0.1m diameter split log on ground			Gunung Katopasa Low Camp, Kecamatan Ulu Bonkga, Kabupaten Tojo Una-Una, Provinsi Sulawesi Tengah, Sulawesi Id., Indonesia	Jimmy McGuire; Jeff Frederick; Benjamin Karin; A. Hamidy; A. Riyanto	Black. Orange-red spots on head grading to yellow posteriorly. Tail incomplete.
	15213	M	Sphenomorphus tropidonotus	M			2017-08-15	16:40:00		80	123	17.65	-1.13873	121.443	8	387	Selectively logged forest; 1.5m up on 30" trunk, 30" DBH			Gunung Katopasa Low Camp, Kecamatan Ulu Bonkga, Kabupaten Tojo Una-Una, Provinsi Sulawesi Tengah, Sulawesi Id., Indonesia	Jimmy McGuire; Jeff Frederick; Benjamin Karin; A. Hamidy; A. Riyanto	Yellow throat wash. Yellow on lateral head, orange scapular wash. Ben photo
	15214	M	Eutropis rudis	female			2017-08-16	09:52:00		80	109	15.35	-1.13165	121.442	10	305	Selectively logged forest; on trail in sunny spot			Gunung Katopasa Low Camp, Kecamatan Ulu Bonkga, Kabupaten Tojo Una-Una, Provinsi Sulawesi Tengah, Sulawesi Id., Indonesia	Jimmy McGuire; Jeff Frederick; Benjamin Karin; A. Hamidy; A. Riyanto	Throat slightly orange. Ben photo
	15215	B	Eutropis rudis				2017-08-16	10:50:00		33	17	1.08	-1.13158	121.438		397	Selectively logged forest; appears to have fallen into slot canyon from above. On boulder			Gunung Katopasa Low Camp, Kecamatan Ulu Bonkga, Kabupaten Tojo Una-Una, Provinsi Sulawesi Tengah, Sulawesi Id., Indonesia	Jimmy McGuire; Jeff Frederick; Benjamin Karin; A. Hamidy; A. Riyanto	Juvenile
	15216	M	Eutropis rudis	male			2017-08-16	12:30:00		81	135	17.3	-1.13647	121.445	30	363	Slot canyon stream; on sticky trap 1-18			Gunung Katopasa Low Camp, Kecamatan Ulu Bonkga, Kabupaten Tojo Una-Una, Provinsi Sulawesi Tengah, Sulawesi Id., Indonesia	Jimmy McGuire; Jeff Frederick; Benjamin Karin; A. Hamidy; A. Riyanto	Throat peach/orange, no black markings. Ben Photo
	15217	M	Sphenomorphus tropidonotus				2017-08-16	20:20:00		41	66	1.63	-1.13669	121.445	7	406	Selectively logged forest; sticky trap 1-13 on tree buttress (photo)			Gunung Katopasa Low Camp, Kecamatan Ulu Bonkga, Kabupaten Tojo Una-Una, Provinsi Sulawesi Tengah, Sulawesi Id., Indonesia	Jimmy McGuire; Jeff Frederick; Benjamin Karin; A. Hamidy; A. Riyanto
	15218	B	Sphenomorphus tropidonotus				2017-08-16	20:32:00		40.5	64	2	-1.13542	121.445	8	411	Selectively logged forest; on sticky trap 1-25			Gunung Katopasa Low Camp, Kecamatan Ulu Bonkga, Kabupaten Tojo Una-Una, Provinsi Sulawesi Tengah, Sulawesi Id., Indonesia	Jimmy McGuire; Jeff Frederick; Benjamin Karin; A. Hamidy; A. Riyanto
	15219		Sphenomorphus tropidonotus				2017-08-16						-1.13877	121.443	10	411				Gunung Katopasa Low Camp, Kecamatan Ulu Bonkga, Kabupaten Tojo Una-Una, Provinsi Sulawesi Tengah, Sulawesi Id., Indonesia	Jimmy McGuire; Jeff Frederick; Benjamin Karin; A. Hamidy; A. Riyanto	This is JAM 15273
	15220	M	Sphenomorphus variegatus				2017-08-16	07:45:00		49	86	2.58	-1.13647	121.445	8	409	Selectively logged forest; on ground at base of tree buttress, sticky trap 1-16			Gunung Katopasa Low Camp, Kecamatan Ulu Bonkga, Kabupaten Tojo Una-Una, Provinsi Sulawesi Tengah, Sulawesi Id., Indonesia	Jimmy McGuire; Jeff Frederick; Benjamin Karin; A. Hamidy; A. Riyanto
	15221	B	Limnonectes sp. "G2"				2017-08-15	22:20:00		57		14.97	-1.12988	121.444	10	285	Selectively logged forest; on trail 0.2m from small 1m stream (shallow mud and rock botom)			Gunung Katopasa Low Camp, Kecamatan Ulu Bonkga, Kabupaten Tojo Una-Una, Provinsi Sulawesi Tengah, Sulawesi Id., Indonesia	Jimmy McGuire; Jeff Frederick; Benjamin Karin; A. Hamidy; A. Riyanto
	15222	B	Limnonectes sp. "I"				2017-08-15	22:25:00		37		4.22	-1.12988	121.444	10	285	Selectively logged forest; 20cm from river edge on small pebbles; river 10m wide, rocky			Gunung Katopasa Low Camp, Kecamatan Ulu Bonkga, Kabupaten Tojo Una-Una, Provinsi Sulawesi Tengah, Sulawesi Id., Indonesia	Jimmy McGuire; Jeff Frederick; Benjamin Karin; A. Hamidy; A. Riyanto
	15223	B	Limnonectes sp. "I"				2017-08-15	23:42:00		103		83.82	-1.12997	121.444	6	319	Selectively logged forest; in mucky side stream 10m away from 2.5m wide side stream			Gunung Katopasa Low Camp, Kecamatan Ulu Bonkga, Kabupaten Tojo Una-Una, Provinsi Sulawesi Tengah, Sulawesi Id., Indonesia	Jimmy McGuire; Jeff Frederick; Benjamin Karin; A. Hamidy; A. Riyanto
	15224	M	Limnonectes sp. "I"				2017-08-15	23:57:00		48		9.17	-1.13052	121.442	3	327	Selectively logged forest; on 2m wide boulder in waterfall of 4m wide fast flow rocky stream			Gunung Katopasa Low Camp, Kecamatan Ulu Bonkga, Kabupaten Tojo Una-Una, Provinsi Sulawesi Tengah, Sulawesi Id., Indonesia	Jimmy McGuire; Jeff Frederick; Benjamin Karin; A. Hamidy; A. Riyanto
	15225		Limnonectes sp. "G2"				2017-08-15						-1.12955	121.445	5	280				Gunung Katopasa Low Camp, Kecamatan Ulu Bonkga, Kabupaten Tojo Una-Una, Provinsi Sulawesi Tengah, Sulawesi Id., Indonesia	Jimmy McGuire; Jeff Frederick; Benjamin Karin; A. Hamidy; A. Riyanto	Escaped
	15226	B	Duttaphrynus melanostictus				2017-08-15	23:16:00		91		51.5	-1.12784	121.449	3	262	Kebun; on ground in garden scrub			Gunung Katopasa Low Camp, Kecamatan Ulu Bonkga, Kabupaten Tojo Una-Una, Provinsi Sulawesi Tengah, Sulawesi Id., Indonesia	Jimmy McGuire; Jeff Frederick; Benjamin Karin; A. Hamidy; A. Riyanto
	15227	M	Duttaphrynus melanostictus				2017-08-15	23:16:00		95		57.29	-1.12784	121.449	3	262	Kebun; on ground in garden scrub			Gunung Katopasa Low Camp, Kecamatan Ulu Bonkga, Kabupaten Tojo Una-Una, Provinsi Sulawesi Tengah, Sulawesi Id., Indonesia	Jimmy McGuire; Jeff Frederick; Benjamin Karin; A. Hamidy; A. Riyanto
	15228	B	Psammodynastes pulverulentus				2017-08-16	00:15:00		414	89	28.01	-1.13207	121.439	6	358	Selectively logged forest; on twig in green vegetation 1m above ground			Gunung Katopasa Low Camp, Kecamatan Ulu Bonkga, Kabupaten Tojo Una-Una, Provinsi Sulawesi Tengah, Sulawesi Id., Indonesia	Jimmy McGuire; Jeff Frederick; Benjamin Karin; A. Hamidy; A. Riyanto
	15229	M	Chrysopelea paradisi				2017-08-16	12:50:00		553	235	30.94	-1.13299	121.45	3	402	Coconut plantation; 1.8m up on coconut palm trunk			Gunung Katopasa Low Camp, Kecamatan Ulu Bonkga, Kabupaten Tojo Una-Una, Provinsi Sulawesi Tengah, Sulawesi Id., Indonesia	Jimmy McGuire; Jeff Frederick; Benjamin Karin; A. Hamidy; A. Riyanto
	15230	B	Draco beccarii				2017-08-16	13:40:00		65	127	3.46	-1.1347	121.45	5	417	Coconut plantation; 4m up on 12" coco, 12" bh shade			Gunung Katopasa Low Camp, Kecamatan Ulu Bonkga, Kabupaten Tojo Una-Una, Provinsi Sulawesi Tengah, Sulawesi Id., Indonesia	Jimmy McGuire; Jeff Frederick; Benjamin Karin; A. Hamidy; A. Riyanto	Dewlap orange, patagium orange, black hemipenes
	15231	M	Draco beccarii				2017-08-16	14:00:00		64	132	3.54	-1.13657	121.451	5	441	Kebun/orchard 3m up on 14" trunk, 24" bh shade			Gunung Katopasa Low Camp, Kecamatan Ulu Bonkga, Kabupaten Tojo Una-Una, Provinsi Sulawesi Tengah, Sulawesi Id., Indonesia	Jimmy McGuire; Jeff Frederick; Benjamin Karin; A. Hamidy; A. Riyanto	Dewlap orange, patagium orange, black hemipenes
Genus species	15232		recording error no specimen				2017-08-16													Gunung Katopasa Low Camp, Kecamatan Ulu Bonkga, Kabupaten Tojo Una-Una, Provinsi Sulawesi Tengah, Sulawesi Id., Indonesia	Jimmy McGuire; Jeff Frederick; Benjamin Karin; A. Hamidy; A. Riyanto	Counted twice, this is JAM 15281
	15233	B	Sphenomorphus variegatus				2017-08-16	18:10:00		51	65	3.05	-1.13203	121.437	8	434	Selectively logged forest; in pitfall bucket line 1, bucket 2, steep slope			Gunung Katopasa Low Camp, Kecamatan Ulu Bonkga, Kabupaten Tojo Una-Una, Provinsi Sulawesi Tengah, Sulawesi Id., Indonesia	Jimmy McGuire; Jeff Frederick; Benjamin Karin; A. Hamidy; A. Riyanto
	15234	B	Eutropis rudis				2017-08-16	19:50:00		47	72	3.16	-1.13593	121.445	9	395	Good selectively logged forest; on sticky trap 1-24 on tree buttress			Gunung Katopasa Low Camp, Kecamatan Ulu Bonkga, Kabupaten Tojo Una-Una, Provinsi Sulawesi Tengah, Sulawesi Id., Indonesia	Jimmy McGuire; Jeff Frederick; Benjamin Karin; A. Hamidy; A. Riyanto
	15235	M	Eutropis rudis	female	Y	Adult	2017-08-16	19:57:00		70	115	9.78	-1.13593	121.444	5	400	Good selectively logged forest; on sticky trap 1-19 on horizontal downed tree 8" diameter, 0.6m above ground			Gunung Katopasa Low Camp, Kecamatan Ulu Bonkga, Kabupaten Tojo Una-Una, Provinsi Sulawesi Tengah, Sulawesi Id., Indonesia	Jimmy McGuire; Jeff Frederick; Benjamin Karin; A. Hamidy; A. Riyanto	Gravid
	15236	M	Limnonectes sp. "G2"				2017-08-16	18:40:00		45		8.39	-1.13218	121.438	3	375	Selectively logged forest; in mucky stream next to camp			Gunung Katopasa Low Camp, Kecamatan Ulu Bonkga, Kabupaten Tojo Una-Una, Provinsi Sulawesi Tengah, Sulawesi Id., Indonesia	Jimmy McGuire; Jeff Frederick; Benjamin Karin; A. Hamidy; A. Riyanto	Recorded -- call 1004
	15237	B	Limnonectes sp. "G2"	female	Y	Adult	2017-08-16	21:48:00		70		26.26	-1.13609	121.445	5	394	Disturbed forest; on trail away from stream			Gunung Katopasa Low Camp, Kecamatan Ulu Bonkga, Kabupaten Tojo Una-Una, Provinsi Sulawesi Tengah, Sulawesi Id., Indonesia	Jimmy McGuire; Jeff Frederick; Benjamin Karin; A. Hamidy; A. Riyanto	Bicolor black/white eggs, pretty large, not a large number (~60 eggs)
	15238	B	Limnonectes sp. "I"				2017-08-16	19:15:00		130		168.4	-1.1318	121.441	7	354	Selectively logged forest; on Ground 10m from stream			Gunung Katopasa Low Camp, Kecamatan Ulu Bonkga, Kabupaten Tojo Una-Una, Provinsi Sulawesi Tengah, Sulawesi Id., Indonesia	Jimmy McGuire; Jeff Frederick; Benjamin Karin; A. Hamidy; A. Riyanto
	15239	B	Limnonectes sp. "I"				2017-08-16	22:25:00		118		126.28	-1.12992	121.444	7	329	Selectively logged forest; in green vegetation on bank of 6m wide fast-flow river, 3m from water			Gunung Katopasa Low Camp, Kecamatan Ulu Bonkga, Kabupaten Tojo Una-Una, Provinsi Sulawesi Tengah, Sulawesi Id., Indonesia	Jimmy McGuire; Jeff Frederick; Benjamin Karin; A. Hamidy; A. Riyanto
	15240	B	Limnonectes sp. "1"				2017-08-16	20:05:00		38		4.15	-1.13727	121.444	9	418	Good selectively logged forest; on trail next to kolam/rawa			Gunung Katopasa Low Camp, Kecamatan Ulu Bonkga, Kabupaten Tojo Una-Una, Provinsi Sulawesi Tengah, Sulawesi Id., Indonesia	Jimmy McGuire; Jeff Frederick; Benjamin Karin; A. Hamidy; A. Riyanto
	15241	M	Limnonectes sp. "1"	male			2017-08-16	20:40:00		39		4.74	-1.13727	121.444	9	418	Good selectively logged forest; in mud bottomed kolam/rawa			Gunung Katopasa Low Camp, Kecamatan Ulu Bonkga, Kabupaten Tojo Una-Una, Provinsi Sulawesi Tengah, Sulawesi Id., Indonesia	Jimmy McGuire; Jeff Frederick; Benjamin Karin; A. Hamidy; A. Riyanto	Recorded calls 1007 & 1008
	15242	M	Limnonectes sp. "1"	male			2017-08-16	20:40:00		36		3.73	-1.13727	121.444	9	418	Good selectively logged forest; in kolam on small 1m wide island on ground			Gunung Katopasa Low Camp, Kecamatan Ulu Bonkga, Kabupaten Tojo Una-Una, Provinsi Sulawesi Tengah, Sulawesi Id., Indonesia	Jimmy McGuire; Jeff Frederick; Benjamin Karin; A. Hamidy; A. Riyanto	May have been recorded along with 15241. Check also 1006
	15243	M	Limnonectes sp. "G2"				2017-08-16	21:05:00		53		12.41	-1.13727	121.444	9	418	Good selectively logged forest; in water of kolam, 25cm depth 0.5m from pool edge			Gunung Katopasa Low Camp, Kecamatan Ulu Bonkga, Kabupaten Tojo Una-Una, Provinsi Sulawesi Tengah, Sulawesi Id., Indonesia	Jimmy McGuire; Jeff Frederick; Benjamin Karin; A. Hamidy; A. Riyanto	Yellow ventral wash
	15244	B	Sphenomorphus variegatus				2017-08-16	09:33:00		29	16 inc.	0.62	-1.12231	121.436		420	Selectively logged forest; foot of tree			Gunung Katopasa Low Camp, Kecamatan Ulu Bonkga, Kabupaten Tojo Una-Una, Provinsi Sulawesi Tengah, Sulawesi Id., Indonesia	Jimmy McGuire; Jeff Frederick; Benjamin Karin; A. Hamidy; A. Riyanto	Incomplete tail
	15245	B	Sphenomorphus variegatus				2017-08-16	16:38:00		34	50	0.97	-1.13572	121.435		442	Selectively logged forest; on leaf litter			Gunung Katopasa Low Camp, Kecamatan Ulu Bonkga, Kabupaten Tojo Una-Una, Provinsi Sulawesi Tengah, Sulawesi Id., Indonesia	Jimmy McGuire; Jeff Frederick; Benjamin Karin; A. Hamidy; A. Riyanto
	15246	B	Sphenomorphus variegatus				2017-08-16	19:01:00		31.5	60	0.8	-1.13498	121.435		461	Selectively logged forest; on leaf litter			Gunung Katopasa Low Camp, Kecamatan Ulu Bonkga, Kabupaten Tojo Una-Una, Provinsi Sulawesi Tengah, Sulawesi Id., Indonesia	Jimmy McGuire; Jeff Frederick; Benjamin Karin; A. Hamidy; A. Riyanto
	15247	M	Tytthoscincus sp.				2017-08-16	19:00:00		31	37	0.78	-1.13498	121.435		461	Selectively logged forest; on leaf litter			Gunung Katopasa Low Camp, Kecamatan Ulu Bonkga, Kabupaten Tojo Una-Una, Provinsi Sulawesi Tengah, Sulawesi Id., Indonesia	Jimmy McGuire; Jeff Frederick; Benjamin Karin; A. Hamidy; A. Riyanto
	15248	B	Tytthoscincus sp.	female	Y	Adult	2017-08-16	18:05:00		31	39	0.72	-1.13532	121.434		572	Selectively logged forest; rock and leaf litter			Gunung Katopasa Low Camp, Kecamatan Ulu Bonkga, Kabupaten Tojo Una-Una, Provinsi Sulawesi Tengah, Sulawesi Id., Indonesia	Jimmy McGuire; Jeff Frederick; Benjamin Karin; A. Hamidy; A. Riyanto
	15249	B	Cyrtodactylus sp.	female			2017-08-16	18:37:00		46	64	1.6	-1.13498	121.435		461	Selectively logged forest; boulder			Gunung Katopasa Low Camp, Kecamatan Ulu Bonkga, Kabupaten Tojo Una-Una, Provinsi Sulawesi Tengah, Sulawesi Id., Indonesia	Jimmy McGuire; Jeff Frederick; Benjamin Karin; A. Hamidy; A. Riyanto
	15250	B	Cyrtodactylus sp.				2017-08-16	19:53:00		58	87	3.5	-1.13427	121.435		482	Selectively logged forest; on rotten tree			Gunung Katopasa Low Camp, Kecamatan Ulu Bonkga, Kabupaten Tojo Una-Una, Provinsi Sulawesi Tengah, Sulawesi Id., Indonesia	Jimmy McGuire; Jeff Frederick; Benjamin Karin; A. Hamidy; A. Riyanto
Genus species	15251		recording error no specimen				2017-08-16													Gunung Katopasa Low Camp, Kecamatan Ulu Bonkga, Kabupaten Tojo Una-Una, Provinsi Sulawesi Tengah, Sulawesi Id., Indonesia	Jimmy McGuire; Jeff Frederick; Benjamin Karin; A. Hamidy; A. Riyanto	Recording error no specimen
	15252	B	Limnonectes sp. "1"				2017-08-16	19:45:00		32		2.74	-1.13427	121.435		482	Selectively logged forest; on small stream, small waterfall on wet leaf litter			Gunung Katopasa Low Camp, Kecamatan Ulu Bonkga, Kabupaten Tojo Una-Una, Provinsi Sulawesi Tengah, Sulawesi Id., Indonesia	Jimmy McGuire; Jeff Frederick; Benjamin Karin; A. Hamidy; A. Riyanto
	15253	M	Limnonectes sp. "1"				2017-08-16	19:50:00		35		3.83	-1.13427	121.435		482	Selectively logged forest; on small stream, small waterfall on wet leaf litter			Gunung Katopasa Low Camp, Kecamatan Ulu Bonkga, Kabupaten Tojo Una-Una, Provinsi Sulawesi Tengah, Sulawesi Id., Indonesia	Jimmy McGuire; Jeff Frederick; Benjamin Karin; A. Hamidy; A. Riyanto
	15254	M	Limnonectes sp. "G2"	female	Y	Adult	2017-08-16	10:55:00		71		26.18	-1.13158	121.438		526	Slot canyon in 3cm deep water on pebbles, stream along shore of stream in slot canyon			Gunung Katopasa Low Camp, Kecamatan Ulu Bonkga, Kabupaten Tojo Una-Una, Provinsi Sulawesi Tengah, Sulawesi Id., Indonesia	Jimmy McGuire; Jeff Frederick; Benjamin Karin; A. Hamidy; A. Riyanto	Large & small bicolor eggs in bunches
	15255	B	Xenochrophis trianguligerus				2017-08-16	11:00:00		763	140	219.89	-1.13158	121.438		526	Slot canyon in 3cm deep water on pebbles, stream along shore of stream in slot canyon			Gunung Katopasa Low Camp, Kecamatan Ulu Bonkga, Kabupaten Tojo Una-Una, Provinsi Sulawesi Tengah, Sulawesi Id., Indonesia	Jimmy McGuire; Jeff Frederick; Benjamin Karin; A. Hamidy; A. Riyanto
	15256	M	Eutropis rudis	male			2017-08-16	12:30:00		84	121	17.8	-1.13588	121.444	10	403	Selectively logged forest; on sticky trap 1-23			Gunung Katopasa Low Camp, Kecamatan Ulu Bonkga, Kabupaten Tojo Una-Una, Provinsi Sulawesi Tengah, Sulawesi Id., Indonesia	Jimmy McGuire; Jeff Frederick; Benjamin Karin; A. Hamidy; A. Riyanto	Yellow abdomen, blue throat with out black
	15257	B	Eutropis rudis	male			2017-08-16			78	104	13.49	-1.13717	121.444	10	391	Selectively logged forest; on sticky trap 1-9A, on ground beside 2m tall boulder			Gunung Katopasa Low Camp, Kecamatan Ulu Bonkga, Kabupaten Tojo Una-Una, Provinsi Sulawesi Tengah, Sulawesi Id., Indonesia	Jimmy McGuire; Jeff Frederick; Benjamin Karin; A. Hamidy; A. Riyanto	Blue throat with black spots
	15258	B	Eutropis rudis	male			2017-08-16			82	110	13.19	-1.13717	121.444	10	391	Selectively logged forest; on sticky trap 1-9A, on ground beside 2m tall boulder			Gunung Katopasa Low Camp, Kecamatan Ulu Bonkga, Kabupaten Tojo Una-Una, Provinsi Sulawesi Tengah, Sulawesi Id., Indonesia	Jimmy McGuire; Jeff Frederick; Benjamin Karin; A. Hamidy; A. Riyanto	Yellow throat with black spots extends to abdomen
	15259	M	Limnonectes sp. "I"				2017-08-16	11:30:00		29		2.08	-1.13722	121.438		532	Stream; collected by electroshocking (by Yayat)			Gunung Katopasa Low Camp, Kecamatan Ulu Bonkga, Kabupaten Tojo Una-Una, Provinsi Sulawesi Tengah, Sulawesi Id., Indonesia	Jimmy McGuire; Jeff Frederick; Benjamin Karin; A. Hamidy; A. Riyanto
	15260	M	Limnonectes sp. "I"				2017-08-16	11:30:00		85		42.82	-1.13722	121.438		532	Stream; collected by electroshocking (by Yayat)			Gunung Katopasa Low Camp, Kecamatan Ulu Bonkga, Kabupaten Tojo Una-Una, Provinsi Sulawesi Tengah, Sulawesi Id., Indonesia	Jimmy McGuire; Jeff Frederick; Benjamin Karin; A. Hamidy; A. Riyanto
	15261	M	Limnonectes sp. "I"				2017-08-16	11:30:00		42		8.15	-1.13722	121.438		532	Stream; collected by electroshocking (by Yayat)			Gunung Katopasa Low Camp, Kecamatan Ulu Bonkga, Kabupaten Tojo Una-Una, Provinsi Sulawesi Tengah, Sulawesi Id., Indonesia	Jimmy McGuire; Jeff Frederick; Benjamin Karin; A. Hamidy; A. Riyanto
	15262	M	Limnonectes sp. "1"				2017-08-16	11:30:00		25		1.6	-1.13722	121.438		532	Stream; collected by electroshocking (by Yayat)			Gunung Katopasa Low Camp, Kecamatan Ulu Bonkga, Kabupaten Tojo Una-Una, Provinsi Sulawesi Tengah, Sulawesi Id., Indonesia	Jimmy McGuire; Jeff Frederick; Benjamin Karin; A. Hamidy; A. Riyanto
	15263	B	Ahaetulla prasina				2017-08-16	13:16:00		737	443	23.84	-1.15147	121.449		786	Pos 2			Gunung Katopasa Low Camp, Kecamatan Ulu Bonkga, Kabupaten Tojo Una-Una, Provinsi Sulawesi Tengah, Sulawesi Id., Indonesia	Jimmy McGuire; Jeff Frederick; Benjamin Karin; A. Hamidy; A. Riyanto
	15264	M	Eutropis rudis	female			2017-08-17	10:40:00		76	116	12.71	-1.13754	121.444	10	337	Selectively logged forest; sticky trap 1-8, on 15cm diameter log over small 1m wide stream			Gunung Katopasa Low Camp, Kecamatan Ulu Bonkga, Kabupaten Tojo Una-Una, Provinsi Sulawesi Tengah, Sulawesi Id., Indonesia	Jimmy McGuire; Jeff Frederick; Benjamin Karin; A. Hamidy; A. Riyanto	No throat color
	15265	M	Eutropis rudis				2017-08-17	10:45:00		64	100	7.54	-1.13782	121.444	10	447	Selectively logged forest; Sticky trap 1-7, on ground beneath large limestone cliff			Gunung Katopasa Low Camp, Kecamatan Ulu Bonkga, Kabupaten Tojo Una-Una, Provinsi Sulawesi Tengah, Sulawesi Id., Indonesia	Jimmy McGuire; Jeff Frederick; Benjamin Karin; A. Hamidy; A. Riyanto	No throat color
	15266	B	Cyrtodactylus sp.				2017-08-17	10:56:00		61	40	3.12	-1.13832	121.444	5	360	Selectively logged forest; sticky trap 1-3, on tree about 1.5m up beside trail			Gunung Katopasa Low Camp, Kecamatan Ulu Bonkga, Kabupaten Tojo Una-Una, Provinsi Sulawesi Tengah, Sulawesi Id., Indonesia	Jimmy McGuire; Jeff Frederick; Benjamin Karin; A. Hamidy; A. Riyanto
Genus species	15267	M/B	Shed snake skin (tissue only)				2017-08-17	11:30:00					-1.12969	121.446	10	302	Selectively logged forest; beside trail ~3m from stream			Gunung Katopasa Low Camp, Kecamatan Ulu Bonkga, Kabupaten Tojo Una-Una, Provinsi Sulawesi Tengah, Sulawesi Id., Indonesia	Jimmy McGuire; Jeff Frederick; Benjamin Karin; A. Hamidy; A. Riyanto
	15268	M	Limnonectes sp. "I"				2017-08-17			170		349.8	-1.1308	121.442	50	344				Gunung Katopasa Low Camp, Kecamatan Ulu Bonkga, Kabupaten Tojo Una-Una, Provinsi Sulawesi Tengah, Sulawesi Id., Indonesia	Jimmy McGuire; Jeff Frederick; Benjamin Karin; A. Hamidy; A. Riyanto
	15269	B	Limnonectes sp. "I"				2017-08-17	12:15:00		117		126.63	-1.1308	121.442	50	334				Gunung Katopasa Low Camp, Kecamatan Ulu Bonkga, Kabupaten Tojo Una-Una, Provinsi Sulawesi Tengah, Sulawesi Id., Indonesia	Jimmy McGuire; Jeff Frederick; Benjamin Karin; A. Hamidy; A. Riyanto
	15270	B	Limnonectes sp. "1"	female			2017-08-14	21:40:00		42		6.82	-1.13213	121.438	5	377	Secondary forest; in shallow riffle/tiny stream sitting 50% submerged, leaf litter substrate			Gunung Katopasa Low Camp, Kecamatan Ulu Bonkga, Kabupaten Tojo Una-Una, Provinsi Sulawesi Tengah, Sulawesi Id., Indonesia	Jimmy McGuire; Jeff Frederick; Benjamin Karin; A. Hamidy; A. Riyanto	Gravid, moderately large black/yellow eggs
	15271	B	Limnonectes sp. "1"	male			2017-08-14			38		4.84	-1.14515	121.449		626				Gunung Katopasa Low Camp, Kecamatan Ulu Bonkga, Kabupaten Tojo Una-Una, Provinsi Sulawesi Tengah, Sulawesi Id., Indonesia	Jimmy McGuire; Jeff Frederick; Benjamin Karin; A. Hamidy; A. Riyanto	Recorded by Amir "16ps 2057?"
	15272	M	Sphenomorphus tropidonotus				2017-08-14			81.5	83	17	-1.12963	121.445		364	Long dead			Gunung Katopasa Low Camp, Kecamatan Ulu Bonkga, Kabupaten Tojo Una-Una, Provinsi Sulawesi Tengah, Sulawesi Id., Indonesia	Jimmy McGuire; Jeff Frederick; Benjamin Karin; A. Hamidy; A. Riyanto	Long dead
	15273	B	Sphenomorphus tropidonotus				2017-08-16	08:05:00		46	79	2.99	-1.13877	121.443		411	Good selectively logged forest; on sticky trap 1-1 at base of tree buttress			Gunung Katopasa Low Camp, Kecamatan Ulu Bonkga, Kabupaten Tojo Una-Una, Provinsi Sulawesi Tengah, Sulawesi Id., Indonesia	Jimmy McGuire; Jeff Frederick; Benjamin Karin; A. Hamidy; A. Riyanto
	15274	M	Cyrtodactylus jellesmae	female	Y	Adult	2017-08-16			67	83	4.92	-1.1296	121.445		365				Gunung Katopasa Low Camp, Kecamatan Ulu Bonkga, Kabupaten Tojo Una-Una, Provinsi Sulawesi Tengah, Sulawesi Id., Indonesia	Jimmy McGuire; Jeff Frederick; Benjamin Karin; A. Hamidy; A. Riyanto
	15275	B	Cyrtodactylus jellesmae	male			2017-08-16			64	63	3.94	-1.12963	121.445		364				Gunung Katopasa Low Camp, Kecamatan Ulu Bonkga, Kabupaten Tojo Una-Una, Provinsi Sulawesi Tengah, Sulawesi Id., Indonesia	Jimmy McGuire; Jeff Frederick; Benjamin Karin; A. Hamidy; A. Riyanto
	15276	M	Cyrtodactylus jellesmae	male			2017-08-16			53	72	2.4	-1.13341	121.438		365				Gunung Katopasa Low Camp, Kecamatan Ulu Bonkga, Kabupaten Tojo Una-Una, Provinsi Sulawesi Tengah, Sulawesi Id., Indonesia	Jimmy McGuire; Jeff Frederick; Benjamin Karin; A. Hamidy; A. Riyanto
	15277	M	Tytthoscincus sp.				2017-08-16	08:00:00		34	28	0.77	-1.13203	121.437	8	434	Selectively logged forest; in pitfall line 1 on steep slope			Gunung Katopasa Low Camp, Kecamatan Ulu Bonkga, Kabupaten Tojo Una-Una, Provinsi Sulawesi Tengah, Sulawesi Id., Indonesia	Jimmy McGuire; Jeff Frederick; Benjamin Karin; A. Hamidy; A. Riyanto
	15278	B	Chrysopelea paradisi				2017-08-17	12:59:00		515	304	31.85	-1.11952	121.452	10	210	Kebun			Gunung Katopasa Low Camp, Kecamatan Ulu Bonkga, Kabupaten Tojo Una-Una, Provinsi Sulawesi Tengah, Sulawesi Id., Indonesia	Jimmy McGuire; Jeff Frederick; Benjamin Karin; A. Hamidy; A. Riyanto
	15279	M	Limnonectes sp. "1"							32		2.61	-1.14557	121.449		626				Gunung Katopasa Low Camp, Kecamatan Ulu Bonkga, Kabupaten Tojo Una-Una, Provinsi Sulawesi Tengah, Sulawesi Id., Indonesia	Jimmy McGuire; Jeff Frederick; Benjamin Karin; A. Hamidy; A. Riyanto
	15280	B	Eutropis rudis							38	58	1.57	-1.14552	121.449		634				Gunung Katopasa Low Camp, Kecamatan Ulu Bonkga, Kabupaten Tojo Una-Una, Provinsi Sulawesi Tengah, Sulawesi Id., Indonesia	Jimmy McGuire; Jeff Frederick; Benjamin Karin; A. Hamidy; A. Riyanto
	15281	B	Tytthoscincus sp.	female	Y	Adult	2017-08-16			33	15	0.62	-1.13203	121.437	8	434	Selectively logged forest; in pitfall ~500m above low camp			Gunung Katopasa Low Camp, Kecamatan Ulu Bonkga, Kabupaten Tojo Una-Una, Provinsi Sulawesi Tengah, Sulawesi Id., Indonesia	Jimmy McGuire; Jeff Frederick; Benjamin Karin; A. Hamidy; A. Riyanto	Gravid
	15282	B	Psammodynastes pulverulentus				2017-08-17	20:28:00		296	61	9.3	-1.13177	121.44	3	327	Secondary forest; about 1m up in crook of branch			Gunung Katopasa Low Camp, Kecamatan Ulu Bonkga, Kabupaten Tojo Una-Una, Provinsi Sulawesi Tengah, Sulawesi Id., Indonesia	Jimmy McGuire; Jeff Frederick; Benjamin Karin; A. Hamidy; A. Riyanto
	15283	M	Limnonectes sp. "G2"				2017-08-17	20:57:00		57		14.68	-1.13177	121.44	3	327	secondary forest; on ground on edge of trail under shrubbery			Gunung Katopasa Low Camp, Kecamatan Ulu Bonkga, Kabupaten Tojo Una-Una, Provinsi Sulawesi Tengah, Sulawesi Id., Indonesia	Jimmy McGuire; Jeff Frederick; Benjamin Karin; A. Hamidy; A. Riyanto
	15284	M	Sphenomorphus tropidonotus				2017-08-18	09:12:00		53	88	4.51	-1.13624	121.445	10	382	Sticky trap 1-18; on side of stump along trail			Gunung Katopasa Low Camp, Kecamatan Ulu Bonkga, Kabupaten Tojo Una-Una, Provinsi Sulawesi Tengah, Sulawesi Id., Indonesia	Jimmy McGuire; Jeff Frederick; Benjamin Karin; A. Hamidy; A. Riyanto
	15285	B	Eutropis rudis	female			2017-08-18			75	61	10.45	-1.13229	121.438	3	381	Kebun; captured on ponkok in camp			Gunung Katopasa Low Camp, Kecamatan Ulu Bonkga, Kabupaten Tojo Una-Una, Provinsi Sulawesi Tengah, Sulawesi Id., Indonesia	Jimmy McGuire; Jeff Frederick; Benjamin Karin; A. Hamidy; A. Riyanto	No throat or flank color; tail incomplete
	15286	B	Eutropis rudis	male			2017-08-18	12:43:00		85	65	13.77	-1.13196	121.439	3	338	Secondary forest; on trail			Gunung Katopasa Low Camp, Kecamatan Ulu Bonkga, Kabupaten Tojo Una-Una, Provinsi Sulawesi Tengah, Sulawesi Id., Indonesia	Jimmy McGuire; Jeff Frederick; Benjamin Karin; A. Hamidy; A. Riyanto	Orange lips extending to anterior flanks, speckled throat mostly without color
	15287	M	Emoia caeruleocauda	male			2017-08-18	10:45:00		56	93	3.55	-1.13296	121.45		352	Secondary forest; with sago palm			Gunung Katopasa Low Camp, Kecamatan Ulu Bonkga, Kabupaten Tojo Una-Una, Provinsi Sulawesi Tengah, Sulawesi Id., Indonesia	Jimmy McGuire; Jeff Frederick; Benjamin Karin; A. Hamidy; A. Riyanto	Tissue tube says Tytthoscincus sp.
	15288	M	Tytthoscincus sp.				2017-08-18	10:20:00		53	32	0.69	-1.13296	121.45		352	Secondary forest; under sago palm leaf on ground			Gunung Katopasa Low Camp, Kecamatan Ulu Bonkga, Kabupaten Tojo Una-Una, Provinsi Sulawesi Tengah, Sulawesi Id., Indonesia	Jimmy McGuire; Jeff Frederick; Benjamin Karin; A. Hamidy; A. Riyanto
	15289	B	Emoia caeruleocauda				2017-08-18	11:00:00		56	90	3.49	-1.13296	121.45		352	Secondary forest; with sago palm			Gunung Katopasa Low Camp, Kecamatan Ulu Bonkga, Kabupaten Tojo Una-Una, Provinsi Sulawesi Tengah, Sulawesi Id., Indonesia	Jimmy McGuire; Jeff Frederick; Benjamin Karin; A. Hamidy; A. Riyanto
Elevation	15290	B	Ingerophrynus celebensis				2017-08-18	10:00:00		16		0.33	-1.12869	121.435		276				Gunung Katopasa Low Camp, Kecamatan Ulu Bonkga, Kabupaten Tojo Una-Una, Provinsi Sulawesi Tengah, Sulawesi Id., Indonesia	Jimmy McGuire; Jeff Frederick; Benjamin Karin; A. Hamidy; A. Riyanto
	15291	B	Eutropis rudis	male			2017-08-18	13:47:00		72	109	10.43	-1.13163	121.45		339	Secondary forest; in leaf litter			Gunung Katopasa Low Camp, Kecamatan Ulu Bonkga, Kabupaten Tojo Una-Una, Provinsi Sulawesi Tengah, Sulawesi Id., Indonesia	Jimmy McGuire; Jeff Frederick; Benjamin Karin; A. Hamidy; A. Riyanto	Orange throat and abdomen--more rusty than bright orange
	15292	M	Eutropis multifasciata				2017-08-18	13:50:00		97	137	21.47	-1.13163	121.45		339	Secondary forest; in leaf litter			Gunung Katopasa Low Camp, Kecamatan Ulu Bonkga, Kabupaten Tojo Una-Una, Provinsi Sulawesi Tengah, Sulawesi Id., Indonesia	Jimmy McGuire; Jeff Frederick; Benjamin Karin; A. Hamidy; A. Riyanto
	15293	M	Eutropis rudis				2017-08-18	14:23:00		79	127	15.26	-1.13163	121.448		283	Secondary forest; on the ground			Gunung Katopasa Low Camp, Kecamatan Ulu Bonkga, Kabupaten Tojo Una-Una, Provinsi Sulawesi Tengah, Sulawesi Id., Indonesia	Jimmy McGuire; Jeff Frederick; Benjamin Karin; A. Hamidy; A. Riyanto
	15294	M	Hemidactylus frenatus				2017-08-18			44	34 regen.	2.05	-1.13163	121.448		283	Secondary forest; on tree			Gunung Katopasa Low Camp, Kecamatan Ulu Bonkga, Kabupaten Tojo Una-Una, Provinsi Sulawesi Tengah, Sulawesi Id., Indonesia	Jimmy McGuire; Jeff Frederick; Benjamin Karin; A. Hamidy; A. Riyanto	Regenerated tail
	15295	B	Limnonectes sp. "I"				2017-08-18			34		3.36	-1.13322	121.439		362	Secondary forest; in 5m wide fast, rocky stream			Gunung Katopasa Low Camp, Kecamatan Ulu Bonkga, Kabupaten Tojo Una-Una, Provinsi Sulawesi Tengah, Sulawesi Id., Indonesia	Jimmy McGuire; Jeff Frederick; Benjamin Karin; A. Hamidy; A. Riyanto
	15296	B	Limnonectes sp. "I"				2017-08-18			28		1.88	-1.13322	121.439		362	Secondary forest; in 5m wide fast, rocky stream			Gunung Katopasa Low Camp, Kecamatan Ulu Bonkga, Kabupaten Tojo Una-Una, Provinsi Sulawesi Tengah, Sulawesi Id., Indonesia	Jimmy McGuire; Jeff Frederick; Benjamin Karin; A. Hamidy; A. Riyanto
	15297	B	Limnonectes sp. "I"				2017-08-18			23		1.26	-1.13322	121.439	15	473	Secondary forest; in 5m wide fast, rocky stream			Gunung Katopasa Low Camp, Kecamatan Ulu Bonkga, Kabupaten Tojo Una-Una, Provinsi Sulawesi Tengah, Sulawesi Id., Indonesia	Jimmy McGuire; Jeff Frederick; Benjamin Karin; A. Hamidy; A. Riyanto
	15298	M	Limnonectes sp. "I"	male			2017-08-18			14		0.26	-1.13322	121.439	15	473	Secondary forest; in 5m wide fast, rocky stream			Gunung Katopasa Low Camp, Kecamatan Ulu Bonkga, Kabupaten Tojo Una-Una, Provinsi Sulawesi Tengah, Sulawesi Id., Indonesia	Jimmy McGuire; Jeff Frederick; Benjamin Karin; A. Hamidy; A. Riyanto
	15299	B	Chalcorana mocquardi	male			2017-08-14			45		4.48	-1.12655	121.45		365				Gunung Katopasa Low Camp, Kecamatan Ulu Bonkga, Kabupaten Tojo Una-Una, Provinsi Sulawesi Tengah, Sulawesi Id., Indonesia	Jimmy McGuire; Jeff Frederick; Benjamin Karin; A. Hamidy; A. Riyanto
	15300	M	Kaloula baleata				2017-08-18			52		12.24	-1.13227	121.438	6	371	Secondary forest; jumped off 36" diameter tree from height			Gunung Katopasa Low Camp, Kecamatan Ulu Bonkga, Kabupaten Tojo Una-Una, Provinsi Sulawesi Tengah, Sulawesi Id., Indonesia	Jimmy McGuire; Jeff Frederick; Benjamin Karin; A. Hamidy; A. Riyanto
	15301	M	Sphenomorphus variegatus				2017-08-18	21:35:00		32	52	0.88	-1.13746	121.444	5	406	On trap 1-9, base of limestone boulder on ground			Gunung Katopasa Low Camp, Kecamatan Ulu Bonkga, Kabupaten Tojo Una-Una, Provinsi Sulawesi Tengah, Sulawesi Id., Indonesia	Jimmy McGuire; Jeff Frederick; Benjamin Karin; A. Hamidy; A. Riyanto	Found dead
	15302	B	Tropidolaemus subannulatus	female			2017-08-18	22:50:00		444	82	94.22	-1.13841	121.444	5	418	Good selectively logged forest; perched on 1/3" stem aimed at obvious rodent trail on log 0.5m up			Gunung Katopasa Low Camp, Kecamatan Ulu Bonkga, Kabupaten Tojo Una-Una, Provinsi Sulawesi Tengah, Sulawesi Id., Indonesia	Jimmy McGuire; Jeff Frederick; Benjamin Karin; A. Hamidy; A. Riyanto
	15303	B	Limnonectes sp. "G2"				2017-08-18	22:39:00		50		10.07	-1.1372	121.444	10	409	30 cm from waters edge on small (~2m) island in swamp			Gunung Katopasa Low Camp, Kecamatan Ulu Bonkga, Kabupaten Tojo Una-Una, Provinsi Sulawesi Tengah, Sulawesi Id., Indonesia	Jimmy McGuire; Jeff Frederick; Benjamin Karin; A. Hamidy; A. Riyanto	Tube says sp.1
	15304	B	Ophiophagus hannah				2017-08-18	22:50:00					-1.1372	121.444	10	409	In the water at the edge of swamp near drainage			Gunung Katopasa Low Camp, Kecamatan Ulu Bonkga, Kabupaten Tojo Una-Una, Provinsi Sulawesi Tengah, Sulawesi Id., Indonesia	Jimmy McGuire; Jeff Frederick; Benjamin Karin; A. Hamidy; A. Riyanto
	15305	M	Boiga irregularis	male			2017-08-18	20:16:00		1566	365	400	-1.12935	121.44		384	Corn field; 3m from stream 4m from forest			Gunung Katopasa Low Camp, Kecamatan Ulu Bonkga, Kabupaten Tojo Una-Una, Provinsi Sulawesi Tengah, Sulawesi Id., Indonesia	Jimmy McGuire; Jeff Frederick; Benjamin Karin; A. Hamidy; A. Riyanto	Rat in stomach
	15306	B	Polypedates iskandari				2017-08-18	21:00:00		60		10.01	-1.13141	121.441		347	On tree 1m up from ground along small stream			Gunung Katopasa Low Camp, Kecamatan Ulu Bonkga, Kabupaten Tojo Una-Una, Provinsi Sulawesi Tengah, Sulawesi Id., Indonesia	Jimmy McGuire; Jeff Frederick; Benjamin Karin; A. Hamidy; A. Riyanto
	15307	M	Sphenomorphus variegatus				2017-08-18	21:04:00		29	46	0.68	-1.13139	121.441		346	Secondary forest; in leaf litter			Gunung Katopasa Low Camp, Kecamatan Ulu Bonkga, Kabupaten Tojo Una-Una, Provinsi Sulawesi Tengah, Sulawesi Id., Indonesia	Jimmy McGuire; Jeff Frederick; Benjamin Karin; A. Hamidy; A. Riyanto
	15308	B	Limnonectes sp. "G2"	female	Y	Adult	2017-08-18	21:27:00		60		17.65	-1.13198	121.439		344	Secondary forest; on trail			Gunung Katopasa Low Camp, Kecamatan Ulu Bonkga, Kabupaten Tojo Una-Una, Provinsi Sulawesi Tengah, Sulawesi Id., Indonesia	Jimmy McGuire; Jeff Frederick; Benjamin Karin; A. Hamidy; A. Riyanto	Black eggs, small
	15309	M	Ingerophrynus celebensis	female			2017-08-18	22:30:00		80		29.86	-1.13218	121.438	3	409	On ground among dense grasses			Gunung Katopasa Low Camp, Kecamatan Ulu Bonkga, Kabupaten Tojo Una-Una, Provinsi Sulawesi Tengah, Sulawesi Id., Indonesia	Jimmy McGuire; Jeff Frederick; Benjamin Karin; A. Hamidy; A. Riyanto
	15310	B	Kaloula baleata				2017-08-19	00:10:00		49		9.96	-1.1298	121.444	3	297	Perched on large leaf 1m off ground, 2m from waterfall/spring-fed stream			Gunung Katopasa Low Camp, Kecamatan Ulu Bonkga, Kabupaten Tojo Una-Una, Provinsi Sulawesi Tengah, Sulawesi Id., Indonesia	Jimmy McGuire; Jeff Frederick; Benjamin Karin; A. Hamidy; A. Riyanto
	15311	B	Kaloula baleata				2017-08-19	12:15:00		65		27.47	-1.13203	121.437	8	434	Selectively logged forest; in pitfall on steap slope			Gunung Katopasa Low Camp, Kecamatan Ulu Bonkga, Kabupaten Tojo Una-Una, Provinsi Sulawesi Tengah, Sulawesi Id., Indonesia	Jimmy McGuire; Jeff Frederick; Benjamin Karin; A. Hamidy; A. Riyanto
	15312	M	Cyrtodactylus jellesmae	male			2017-08-19	12:15:00		55	60	2.72	-1.13203	121.437	8	434	Selectively logged forest; in pitfall on steap slope			Gunung Katopasa Low Camp, Kecamatan Ulu Bonkga, Kabupaten Tojo Una-Una, Provinsi Sulawesi Tengah, Sulawesi Id., Indonesia	Jimmy McGuire; Jeff Frederick; Benjamin Karin; A. Hamidy; A. Riyanto
	15313	B	Ingerophrynus biporcatus				2017-08-18	10:00:00		31		2.13	-1.12869	121.448		296				Gunung Katopasa Low Camp, Kecamatan Ulu Bonkga, Kabupaten Tojo Una-Una, Provinsi Sulawesi Tengah, Sulawesi Id., Indonesia	Jimmy McGuire; Jeff Frederick; Benjamin Karin; A. Hamidy; A. Riyanto
Latitude	15314	B	Limnonectes sp. "1"	male						39		4.73								Gunung Katopasa Low Camp, Kecamatan Ulu Bonkga, Kabupaten Tojo Una-Una, Provinsi Sulawesi Tengah, Sulawesi Id., Indonesia	Jimmy McGuire; Jeff Frederick; Benjamin Karin; A. Hamidy; A. Riyanto	Male with paired lateral vocal sacs
	15315	M	Eutropis rudis	male						74	104	9.72	-1.13321	121.45		352				Gunung Katopasa Low Camp, Kecamatan Ulu Bonkga, Kabupaten Tojo Una-Una, Provinsi Sulawesi Tengah, Sulawesi Id., Indonesia	Jimmy McGuire; Jeff Frederick; Benjamin Karin; A. Hamidy; A. Riyanto	Lemon yellow throat grading to greenish yellow on chest
	15316	B	Sphenomorphus tropidonotus				2017-08-19	15:38:00		51	82	3.92	-1.13508	121.445	10	382	Good selectively logged forest; sticky trap 1-27			Gunung Katopasa Low Camp, Kecamatan Ulu Bonkga, Kabupaten Tojo Una-Una, Provinsi Sulawesi Tengah, Sulawesi Id., Indonesia	Jimmy McGuire; Jeff Frederick; Benjamin Karin; A. Hamidy; A. Riyanto
	15317	B	Sphenomorphus tropidonotus							59	94	5.48	-1.13385	121.436		420				Gunung Katopasa Low Camp, Kecamatan Ulu Bonkga, Kabupaten Tojo Una-Una, Provinsi Sulawesi Tengah, Sulawesi Id., Indonesia	Jimmy McGuire; Jeff Frederick; Benjamin Karin; A. Hamidy; A. Riyanto	Two "T01" samples from Tri. Not sure which is the real one
	15318	M	Limnonectes sp. "1"							34		3.63	-1.14557	121.449		626				Gunung Katopasa Low Camp, Kecamatan Ulu Bonkga, Kabupaten Tojo Una-Una, Provinsi Sulawesi Tengah, Sulawesi Id., Indonesia	Jimmy McGuire; Jeff Frederick; Benjamin Karin; A. Hamidy; A. Riyanto	Paired vocal sacs
Elevation	15319	M	Psammodynastes pulverulentus				2017-08-19	22:00:00		428	87	29.09	-1.13225	121.438	10	305	Secondary forest; perched on leaf 1.5m up			Gunung Katopasa Low Camp, Kecamatan Ulu Bonkga, Kabupaten Tojo Una-Una, Provinsi Sulawesi Tengah, Sulawesi Id., Indonesia	Jimmy McGuire; Jeff Frederick; Benjamin Karin; A. Hamidy; A. Riyanto
	15320	M	Cyrtodactylus jellesmae				2017-08-19	23:00:00		60	63	3.59	-1.13175	121.441	4	318	Kebun; under thached roof of hut			Gunung Katopasa Low Camp, Kecamatan Ulu Bonkga, Kabupaten Tojo Una-Una, Provinsi Sulawesi Tengah, Sulawesi Id., Indonesia	Jimmy McGuire; Jeff Frederick; Benjamin Karin; A. Hamidy; A. Riyanto
	15321	B	Tytthoscincus sp.				2017-08-21			36	51	0.95	-1.16229	121.448	50	1100				Gunung Katopasa mid-camp	Jimmy McGuire; Jeff Frederick; Benjamin Karin; A. Hamidy; A. Riyanto	100m below Pos 3
	15322	B	Tytthoscincus sp.				2017-08-21			35	45	0.73	-1.16229	121.448	50	1100				Gunung Katopasa mid-camp	Jimmy McGuire; Jeff Frederick; Benjamin Karin; A. Hamidy; A. Riyanto	100m below Pos 3; incomplete tail
	15323	M	Rhacophorus boeadi	male			2017-08-21			55		6.46	-1.18934	121.442		1471	Primary forest; sedge swamp on sedge			Gunung Katopasa mid-camp	Jimmy McGuire; Jeff Frederick; Benjamin Karin; A. Hamidy; A. Riyanto
	15324	B	Rhacophorus boeadi	male			2017-08-21			47		3.6	-1.18934	121.442		1471	Primary forest; sedge swamp on sedge			Gunung Katopasa mid-camp	Jimmy McGuire; Jeff Frederick; Benjamin Karin; A. Hamidy; A. Riyanto	Pale green heavily suffused with brown stippling, prominent white lip stripe, discontinuous flank stripe
	15325	M	Rhacophorus boeadi	male			2017-08-21			45		3.71	-1.18934	121.442		1471	Primary forest; sedge swamp on sedge			Gunung Katopasa mid-camp	Jimmy McGuire; Jeff Frederick; Benjamin Karin; A. Hamidy; A. Riyanto
	15326	M	Rhacophorus boeadi	female			2017-08-21			53		5.88	-1.18934	121.442		1471	Primary forest; sedge swamp on sedge			Gunung Katopasa mid-camp	Jimmy McGuire; Jeff Frederick; Benjamin Karin; A. Hamidy; A. Riyanto
	15327	B	Rhacophorus boeadi	male			2017-08-21			48		3.42	-1.18934	121.442		1471	Primary forest; sedge swamp on sedge			Gunung Katopasa mid-camp	Jimmy McGuire; Jeff Frederick; Benjamin Karin; A. Hamidy; A. Riyanto
	15328	B	Rhacophorus boeadi	femae			2017-08-21			56		6.24	-1.18934	121.442		1471	Primary forest; sedge swamp on sedge			Gunung Katopasa mid-camp	Jimmy McGuire; Jeff Frederick; Benjamin Karin; A. Hamidy; A. Riyanto
	15329	M	Rhacophorus boeadi	male			2017-08-21			45		4	-1.18934	121.442		1471	Primary forest; sedge swamp on sedge			Gunung Katopasa mid-camp	Jimmy McGuire; Jeff Frederick; Benjamin Karin; A. Hamidy; A. Riyanto
	15330	B	Rhacophorus boeadi	female			2017-08-21			55		7.23	-1.18934	121.442		1471	Primary forest; sedge swamp on sedge			Gunung Katopasa mid-camp	Jimmy McGuire; Jeff Frederick; Benjamin Karin; A. Hamidy; A. Riyanto
	15331	B	Rhacophorus boeadi	male			2017-08-21	22:50:00		45		3.87	-1.18931	121.442	6	1490	Primary forest; sedge swamp on sedge			Gunung Katopasa mid-camp	Jimmy McGuire; Jeff Frederick; Benjamin Karin; A. Hamidy; A. Riyanto	Green with so much dark brown stippling that it becomes nearly solid on dorsal body, super prominent lip stripe contiuous with prominent flank stripe. Rhacho sp. eggs opaque white with thin layer of transparent brown jelly surrounding each egg. Full foam nest ~baseball-sized, Total of 271 eggs
	15332	B	Rhacophorus boeadi	female			2017-08-21	22:50:00		60		7.69	-1.18931	121.442	6	1490	Primary forest; sedge swamp on sedge			Gunung Katopasa mid-camp	Jimmy McGuire; Jeff Frederick; Benjamin Karin; A. Hamidy; A. Riyanto	Bright green dorsally without stippling. not much lip or flank striping. Rhacho sp. eggs opaque white with thin layer of transparent brown jelly surrounding each egg. Full foam nest ~baseball-sized, Total of 271 eggs
	15333	M	Rhacophorus boeadi	male			2017-08-21	22:50:00		47.5		4.23	-1.18931	121.442	6	1490	Primary forest sedge swamp in water in amplexus			Gunung Katopasa mid-camp	Jimmy McGuire; Jeff Frederick; Benjamin Karin; A. Hamidy; A. Riyanto	Green overall -- pale green on limbs (rear limbs banded with tan). Brown stippling. Dorsal back darker than limbs. White lip stripe to scapula -- somewhat indistinct. Yellow flank stripe extends to posterior femoral region. white below, white horizontal cloacal stripe.
	15334	B	Rhacophorus boeadi	male			2017-08-21	22:50:00		46		3.98	-1.18931	121.442	6	1490	Primary forest sedge swamp in water in amplexus			Gunung Katopasa mid-camp	Jimmy McGuire; Jeff Frederick; Benjamin Karin; A. Hamidy; A. Riyanto	Tan with abundant dark brown stippling. White lip stripe , yellow flank stripe.
	15335	M	Rhacophorus boeadi	male			2017-08-21	23:02:00		48		4.84	-1.18931	121.442	6	1490	Primary forest; sedge swamp on sedge			Gunung Katopasa mid-camp	Jimmy McGuire; Jeff Frederick; Benjamin Karin; A. Hamidy; A. Riyanto	Bright green, no stippling, super prominent pale yellow lip and flank stripe. Flank stripe bordered dorsally by black line
	15336	M	Polypedates iskandari				2017-08-21	23:00:00	23:40:00	23		0.95	-1.1894	121.442	5	1498	Primary forest; sedge swamp on sedge			Gunung Katopasa mid-camp	Jimmy McGuire; Jeff Frederick; Benjamin Karin; A. Hamidy; A. Riyanto
	15337	M	Rhacophorus boeadi	male			2017-08-21	23:00:00	23:40:00	49		5.38	-1.18945	121.441	5	1486	Primary forest; sedge swamp on sedge, half submerged in water			Gunung Katopasa mid-camp	Jimmy McGuire; Jeff Frederick; Benjamin Karin; A. Hamidy; A. Riyanto	Tan limbs, dark brown dorsum stippled in black. White lip stripe contiuous with pale yellow flank stripe.
	15338	M	Rhacophorus boeadi	male			2017-08-21	23:00:00	23:40:00	45		3.53	-1.18945	121.441	5	1486	Primary forest; sedge swamp on sedge, half submerged in water			Gunung Katopasa mid-camp	Jimmy McGuire; Jeff Frederick; Benjamin Karin; A. Hamidy; A. Riyanto	Tan with dark brown stippling. Darker on back than on flanks, limbs. White lip stripe extends to scapular region. A yellow flank stripe with some blotching. White venterally. Gray hind foot webbing. Tan horizontal cloacal stripe.
	15339	B	Rhacophorus boeadi	male			2017-08-21	23:00:00	23:40:00	46		3.98	-1.18945	121.441	5	1486	Primary forest; sedge swamp on sedge, half submerged in water			Gunung Katopasa mid-camp	Jimmy McGuire; Jeff Frederick; Benjamin Karin; A. Hamidy; A. Riyanto	Uniform green dorsally with brown inverted forhead triangle. Lip stripe prominent but no obvious flank stripe (just brown mottling)
	15340	M	Rhacophorus boeadi	female			2017-08-23	21:35:00		59		7.88	-1.18913	121.442	7	1474	Primary forest; sedge swamp, on 1/2" twig 1.7m up on edge of swamp			Gunung Katopasa mid-camp	Jimmy McGuire; Jeff Frederick; Benjamin Karin; A. Hamidy; A. Riyanto	Dark green with dark brown stippling. obscure lip stripe and no real flank stripe.
	15341	M	Rhacophorus boeadi	male			2017-08-23	21:45:00		47		3.9	-1.18913	121.442	7	1474	Primary forest; sedge swamp on sedge 6" above water			Gunung Katopasa mid-camp	Jimmy McGuire; Jeff Frederick; Benjamin Karin; A. Hamidy; A. Riyanto	Tan and brown dorsally. Yellow lip stripe continuous with flank stripe. Yellow cloacal stripe. White below with gray blotching on throat. Iris bronze
	15342	B	Rhacophorus boeadi	female			2017-08-23	22:12:00		58		7.85	-1.18923	121.441	9	1471	Primary forest; on leaf on tree 4 m up edge of sedge swamp			Gunung Katopasa mid-camp	Jimmy McGuire; Jeff Frederick; Benjamin Karin; A. Hamidy; A. Riyanto	Are from to adjacent localities but were placed in the same bag with no info on how to distinguish them. Just guessed!
	15343	B	Rhacophorus edentulus				2017-08-19	20:33:00		33		1.69	-1.18171	121.446		1364	Selectively logged forest; on branch 1.5m up, 2m from 2m wide mud bottom slow stream			Gunung Katopasa mid-camp	Jimmy McGuire; Jeff Frederick; Benjamin Karin; A. Hamidy; A. Riyanto	Are from to adjacent localities but were placed in the same bag with no info on how to distinguish them. Just guessed!
	15344	M	Rhacophorus edentulus				2017-08-19	20:48:00		32		1.67	-1.1818	121.446		1382	Selectively logged forest; on branch 1m up above 2m wide mud bottom slow stream			Gunung Katopasa mid-camp	Jimmy McGuire; Jeff Frederick; Benjamin Karin; A. Hamidy; A. Riyanto	Are from to adjacent localities but were placed in the same bag with no info on how to distinguish them. Just guessed!
	15345	B	Rhacophorus edentulus				2017-08-19	20:55:00		33		1.69	-1.1821	121.446		1399	Selectively logged forest; 1m above 1m wide stream			Gunung Katopasa mid-camp	Jimmy McGuire; Jeff Frederick; Benjamin Karin; A. Hamidy; A. Riyanto
	15346	B	Rhacophorus edentulus				2017-08-20	19:54:00		33		1.56	-1.17719	121.447		1381	Selectively logged forest; 50cm above the ground on leaves			Gunung Katopasa mid-camp	Jimmy McGuire; Jeff Frederick; Benjamin Karin; A. Hamidy; A. Riyanto
	15347	B	Rhacophorus boeadi				2017-08-21	23:50:00		21		0.67	-1.18852	121.442	7	1499	Primary forest; 1.5 m up on thin leaf			Gunung Katopasa mid-camp	Jimmy McGuire; Jeff Frederick; Benjamin Karin; A. Hamidy; A. Riyanto
	15348	B	Polypedates iskandari				2017-08-23	21:05:00		23		0.74	-1.18909	121.441	6	1484	Primary forest; on leaf 2m up			Gunung Katopasa mid-camp	Jimmy McGuire; Jeff Frederick; Benjamin Karin; A. Hamidy; A. Riyanto
	15349	M	Polypedates iskandari				2017-08-23	22:00:00		59		11.48	-1.1894	121.441	6	1472	Primary forest; sedge swamp, on sedge 6" above water			Gunung Katopasa mid-camp	Jimmy McGuire; Jeff Frederick; Benjamin Karin; A. Hamidy; A. Riyanto
	15350	B	Oreophryne sp.	female			2017-08-21	22:20:00		19		0.67	-1.18852	121.442	7	1499	Primary forest; on leaf 1m up			Gunung Katopasa mid-camp	Jimmy McGuire; Jeff Frederick; Benjamin Karin; A. Hamidy; A. Riyanto	Russet brown (reddish) dorsally with tan snout. Reddish posteriorly near vent. Limbs reddish. Eye bar (posteroventral) prominent. Brown with pale gray speckling ventrally. Throat gray. A tan horizontal flank stripe bordered ventrally by dark brown. Iris brown.
	15351	M	Oreophryne sp.	female			2017-08-21	22:20:00		19		0.76	-1.18852	121.442	7	1499	Primary forest; on leaf 1m up			Gunung Katopasa mid-camp	Jimmy McGuire; Jeff Frederick; Benjamin Karin; A. Hamidy; A. Riyanto	Pale tan with darker tan nape. Orange-tan snout. Tan posteroventral eye bar. Pale yellow ventrally with fine brown/gray mottling/speckling. Iris brown.
	15352	B	Oreophryne sp.				2017-08-23	20:30:00		14		0.54	-1.18697	121.445	7	1499	Primary forest; on leaf 0.7m up			Gunung Katopasa mid-camp	Jimmy McGuire; Jeff Frederick; Benjamin Karin; A. Hamidy; A. Riyanto
	15353	B	Oreophryne sp.	female	Y	Adult	2017-08-23	20:30:00		20		0.83	-1.18697	121.445	7	1499	Primary forest; on leaf 0.7m up			Gunung Katopasa mid-camp	Jimmy McGuire; Jeff Frederick; Benjamin Karin; A. Hamidy; A. Riyanto	Yellow posteriorly with posterodorsal "eye spots" (they all have them, or at least many). Yellow posteroventral wash. Gravid.
	15354	M	Oreophryne sp.				2017-08-23	22:45:00		19		0.6	-1.18894	121.441	4	1490	Primary forest; on leaf 1.8m up			Gunung Katopasa mid-camp	Jimmy McGuire; Jeff Frederick; Benjamin Karin; A. Hamidy; A. Riyanto	Recorded call 1015
	15355	M	Oreophryne sp.	male			2017-08-23	23:00:00		18		0.58	-1.18894	121.441	4	1490	Primary forest; on leaf 1.8m up			Gunung Katopasa mid-camp	Jimmy McGuire; Jeff Frederick; Benjamin Karin; A. Hamidy; A. Riyanto	Recorded. Orange limbs and posterior dorsum. Yellow on flanks anterior dorsum with melanic speckling. Dark inverted triangle on head. White bars at base of each disk and penultimate joints (very thin). Orange posteroventral eye stripe to lip. Pale orange blotches on nape. recorded indirectly while recording 15354 (check 1012).
	15356	M	Oreophryne sp.	female	Y	Adult	2017-08-23	23:25:00		22		0.89	-1.18897	121.442	6	1488	Primary forest; on fern leaf 0.2m up			Gunung Katopasa mid-camp	Jimmy McGuire; Jeff Frederick; Benjamin Karin; A. Hamidy; A. Riyanto	Gravid
	15357	M	Oreophryne sp.	female	Y	Adult	2017-08-23	21:20:00		19		0.64	-1.18366	121.445		1398	Lower montane primary forest; 0.5m up on leaf, away from stream			Gunung Katopasa mid-camp	Jimmy McGuire; Jeff Frederick; Benjamin Karin; A. Hamidy; A. Riyanto	Predominantly tan dorsally with variable black speckling and barring. Pale tan/orange snout. Prominent cream posteroventral eye stripe. Dark gray and brown ventrally with pale speckling. Iris brown.
	15358	B	Oreophryne sp.				2017-08-23			16		0.45	-1.18105	121.446		1375				Gunung Katopasa mid-camp	Jimmy McGuire; Jeff Frederick; Benjamin Karin; A. Hamidy; A. Riyanto
	15359	M	Oreophryne sp.	female			2017-08-22	22:40:00		18		0.57	-1.18941	121.442		1513	1m up on leaf directly off the trail between pos 4 and pos 5			Gunung Katopasa mid-camp	Jimmy McGuire; Jeff Frederick; Benjamin Karin; A. Hamidy; A. Riyanto	Pale yellow dorsally and ventrally with pale orange posteroventral stripe extending behind eye to corner of mouth. Very thin dorsal stripe. iris bronze. Disks small squared off. pale greenish yellow blotches on nape. Yellow ventrally with fine melanic speckling. Iris brown.
	15360	B	Rhacophorus boeadi	female			2017-08-22	21:50:00		56		7.35	-1.18941	121.442	5	1521	Dense sedge swamp; less than one foot under water, 7m from edge/shore rawa. in amplexus with 15361 when captured			Gunung Katopasa mid-camp	Jimmy McGuire; Jeff Frederick; Benjamin Karin; A. Hamidy; A. Riyanto	Made foam nest in bag. Rhaco sp. eggs opaque white with thin layer of transparent brown jelly surrounding each egg. Full foam nest was ~Baseball-sized. Total of 313 eggs.
	15361	B	Rhacophorus boeadi	male			2017-08-22	21:50:00		48		4.95	-1.18941	121.442	5	1521	Dense sedge swamp; less than one foot under water, 7m from edge/shore swamp. in amplexus with 15361 when captured			Gunung Katopasa mid-camp	Jimmy McGuire; Jeff Frederick; Benjamin Karin; A. Hamidy; A. Riyanto	Made foam nest in bag. Rhaco sp. eggs opaque white with thin layer of transparent brown jelly surrounding each egg. Full foam nest was ~Baseball-sized. Total of 313 eggs.
	15362	M	Rhacophorus boeadi	female			2017-08-22	20:10:00		61		8.12	-1.18935	121.442	4	1513	Dense sedge swamp; Perched on branch (1' in diameter) 0.5 feet above water surface, not submerged.			Gunung Katopasa mid-camp	Jimmy McGuire; Jeff Frederick; Benjamin Karin; A. Hamidy; A. Riyanto	Pale yellow with tan stippling (heavily). No real lip stripe or flank stripe.
Latitude	15363	M/B	Rhacophorus boeadi			Nest	2017-08-22													Gunung Katopasa mid-camp	Jimmy McGuire; Jeff Frederick; Benjamin Karin; A. Hamidy; A. Riyanto
	15364	M/B	Rhacophorus boeadi			Nest	2017-08-22						-1.18931	121.442	6	1490				Gunung Katopasa mid-camp	Jimmy McGuire; Jeff Frederick; Benjamin Karin; A. Hamidy; A. Riyanto
	15365	B	Rhabdophis chrysargoides	female			2017-08-21	23:30:00		619	168	87.48	-1.18931	121.442	6	1490	Primary forest; in sedge swamp among sedges			Gunung Katopasa mid-camp	Jimmy McGuire; Jeff Frederick; Benjamin Karin; A. Hamidy; A. Riyanto
	15366	M	Sphenomorphus zimmeri				2017-08-22			31	67	0.66	-1.19363	121.437	6	1581				Gunung Katopasa mid-camp	Jimmy McGuire; Jeff Frederick; Benjamin Karin; A. Hamidy; A. Riyanto
	15367	B	Sphenomorphus zimmeri				2017-08-23	09:45:00		69	142	6.22	-1.18202	121.446	6	1402	Primary forest; on sticky trap 2-20, coming down trunk, 48" tree onto buttress			Gunung Katopasa mid-camp	Jimmy McGuire; Jeff Frederick; Benjamin Karin; A. Hamidy; A. Riyanto
	15368	M	Sphenomorphus zimmeri				2017-08-24	12:55:00		39	8 inc.	1.37	-1.18458	121.445	11	1429	Primary forest; on sticky trap 2-4, 1 foot up vertical trunk; 18" diameter, 14" bh			Gunung Katopasa mid-camp	Jimmy McGuire; Jeff Frederick; Benjamin Karin; A. Hamidy; A. Riyanto	Tail incomplete
	15369	B	Sphenomorphus zimmeri				2017-08-23	10:30:00		74	154	10.03	-1.18311	121.445	2	1405	Primary forest; captured by Awal at base of tree near sticky trap 2-12			Gunung Katopasa mid-camp	Jimmy McGuire; Jeff Frederick; Benjamin Karin; A. Hamidy; A. Riyanto
	15370	M	Sphenomorphus zimmeri	male			2017-08-23	17:30:00		76	148	9.48	-1.18177	121.446	9	1380	Primary forest; on sticky trap 2-23; on 1' log on ground at basw of 36" diameter trunkby hole			Gunung Katopasa mid-camp	Jimmy McGuire; Jeff Frederick; Benjamin Karin; A. Hamidy; A. Riyanto
	15371	B	Sphenomorphus zimmeri				2017-08-23	23:10:00		63	23 inc.	4.75	-1.18894	121.441	4	1490	Primary forest; on sticky trap 3-18; 1.8m up on vertical trunk 24"dbh			Gunung Katopasa mid-camp	Jimmy McGuire; Jeff Frederick; Benjamin Karin; A. Hamidy; A. Riyanto
	15372	M	Sphenomorphus zimmeri	male			2017-08-22	17:00:00		77	167	8.87	-1.18125	121.446	4	1385	Primary forest; on sticky trap 2-29 on 1' diameter log on ground			Gunung Katopasa mid-camp	Jimmy McGuire; Jeff Frederick; Benjamin Karin; A. Hamidy; A. Riyanto
	15373	M	Sphenomorphus zimmeri				2017-08-24	23:02:00		55.5	122	3.4	-1.1874	121.444	6	1500	Primary forest; on ratan front splayed across center stem between pos 4 and 5			Gunung Katopasa mid-camp	Jimmy McGuire; Jeff Frederick; Benjamin Karin; A. Hamidy; A. Riyanto
	15374	M	Eutropis macrophthalma				2017-08-24	10:20:00		65	70 inc.	6.8	-1.18041	121.446	5	1400	Primary forest; on sticky trap 2-35, on fallen tree in forest clearing			Gunung Katopasa mid-camp	Jimmy McGuire; Jeff Frederick; Benjamin Karin; A. Hamidy; A. Riyanto
	15375	B	Eutropis macrophthalma	female			2017-08-22	10:20:00		118	170	44.99	-1.18041	121.446	5	1400	Primary forest; on sticky trap 2-35, on fallen tree in forest clearing			Gunung Katopasa mid-camp	Jimmy McGuire; Jeff Frederick; Benjamin Karin; A. Hamidy; A. Riyanto	Dark yellow ventrally
	15376	M/B	Rhacophorus edentulus			Tadpole	2017-08-24	22:45:00					-1.18186	121.446		1372	Primary forest; in 1m wide, slow flow bud-bottom stream			Gunung Katopasa mid-camp	Jimmy McGuire; Jeff Frederick; Benjamin Karin; A. Hamidy; A. Riyanto	Rhacophorus edentulus--tissue only, just one tadpole
	15377	M/B	Rhacophorus edentulus			Tadpole	2017-08-23	00:50:00					-1.18186	121.446		1372	Primary forest; in 1m wide, slow flow bud-bottom stream			Gunung Katopasa mid-camp	Jimmy McGuire; Jeff Frederick; Benjamin Karin; A. Hamidy; A. Riyanto	Rhacophorus edentulus--2 tadpoles, kept both as untissued vouchers
Collection Date	15378	M/B	Rhacophorus edentulus			Tadpole		20:21:00					-1.16749	121.446	7	1276	Primary forest;			Gunung Katopasa mid-camp	Jimmy McGuire; Jeff Frederick; Benjamin Karin; A. Hamidy; A. Riyanto	One tadpole, voucher to MZB, will take snip of tail for genetic ID--Rhacophorus edentulus
Collection Date	15379	M/B	Rhacophorus edentulus			Tadpole							-1.17983	121.447	4	1351	Primary forest;			Gunung Katopasa mid-camp	Jimmy McGuire; Jeff Frederick; Benjamin Karin; A. Hamidy; A. Riyanto	One Rhacophorus edentulus tadpole. no tissue. one voucher whole tadpole. Pos 4
Collection Date	15380	M	Oligodon tolaki	male						273	33	9.36	-1.13229	121.438	3	381	Secondary forest; on log 1' above ground			Gunung Katopasa Low Camp, Kecamatan Ulu Bonkga, Kabupaten Tojo Una-Una, Provinsi Sulawesi Tengah, Sulawesi Id., Indonesia	Jimmy McGuire; Jeff Frederick; Benjamin Karin; A. Hamidy; A. Riyanto
Collection Date	15381	B	Hypsiscopus plumbea	male						336	57	31.42	-1.13229	121.438	3	381				Gunung Katopasa Low Camp, Kecamatan Ulu Bonkga, Kabupaten Tojo Una-Una, Provinsi Sulawesi Tengah, Sulawesi Id., Indonesia	Jimmy McGuire; Jeff Frederick; Benjamin Karin; A. Hamidy; A. Riyanto
Collection Date	15382	B	Eutropis multifasciata	female						69	166	20.93	-1.13229	121.438	3	381				Gunung Katopasa Low Camp, Kecamatan Ulu Bonkga, Kabupaten Tojo Una-Una, Provinsi Sulawesi Tengah, Sulawesi Id., Indonesia	Jimmy McGuire; Jeff Frederick; Benjamin Karin; A. Hamidy; A. Riyanto
	15383	M	Cyrtodactylus jellesmae	male			2017-08-18	20:08:00		53	4 inc.	2.16	-1.1495	121.448		757	Kebun; on rock 60cm from ground			Gunung Katopasa mid-camp	Jimmy McGuire; Jeff Frederick; Benjamin Karin; A. Hamidy; A. Riyanto
	15384	B	Sphenomorphus zimmeri	male			2017-08-24			78	149	10.46	-1.18211	121.446	6	1383	Primary forest			Gunung Katopasa mid-camp	Jimmy McGuire; Jeff Frederick; Benjamin Karin; A. Hamidy; A. Riyanto
	15385	B	Lipinia infralineolata				2017-08-20	17:30:00		48	12 inc.	1.37	-1.13229	121.438	3	381	On post of pondok in clearing			Gunung Katopasa Low Camp, Kecamatan Ulu Bonkga, Kabupaten Tojo Una-Una, Provinsi Sulawesi Tengah, Sulawesi Id., Indonesia	Jimmy McGuire; Jeff Frederick; Benjamin Karin; A. Hamidy; A. Riyanto
	15386	B	Sphenomorphus zimmeri	male			2017-08-25			69	162	7.98	-1.18975	121.44		1453	Primary forest; On ground in pitfall bucket, pitfall line 3			Gunung Katopasa mid-camp	Jimmy McGuire; Jeff Frederick; Benjamin Karin; A. Hamidy; A. Riyanto
	15387	B	Sphenomorphus zimmeri				2017-08-25	17:15:00		70	139	6.85	-1.19002	121.44	6	1503	Primary forest; on ground in pitfall bucket, pitfall line 3			Gunung Katopasa mid-camp	Jimmy McGuire; Jeff Frederick; Benjamin Karin; A. Hamidy; A. Riyanto
	15388	M	Rhacophorus edentulus				2017-08-25	18:40:00		34		1.74	-1.19719	121.436	8	1650	Primary forest; on 1" stem 2m above 1m slow, rocky stream			Gunung Katopasa mid-camp	Jimmy McGuire; Jeff Frederick; Benjamin Karin; A. Hamidy; A. Riyanto
	15389	M	Occidozyga semipalmata				2017-08-25	19:05:00		32		3.94	-1.19699	121.435	15	1627	Primary forest; on wet rock on 1.5m wide slow, rocky stream			Gunung Katopasa mid-camp	Jimmy McGuire; Jeff Frederick; Benjamin Karin; A. Hamidy; A. Riyanto
	15390	M	Occidozyga semipalmata				2017-08-25	19:22:00		30		3.48	-1.197	121.435	24	1620	Primary forest; on rock floor of 1.5m wide slow, rocky stream			Gunung Katopasa mid-camp	Jimmy McGuire; Jeff Frederick; Benjamin Karin; A. Hamidy; A. Riyanto
	15391	M	Occidozyga semipalmata	female	Y		2017-08-25	19:40:00		19		0.82	-1.19699	121.435	19	1623	Primary forest; jumped into 1m wide rocky stream from mossy bank			Gunung Katopasa mid-camp	Jimmy McGuire; Jeff Frederick; Benjamin Karin; A. Hamidy; A. Riyanto
	15392	B	Occidozyga semipalmata				2017-08-25	20:40:00		28		2.7	-1.19681	121.434	38	1577	Primary forest; on rocky waterfall with rock crevices--in crevice, low flow			Gunung Katopasa mid-camp	Jimmy McGuire; Jeff Frederick; Benjamin Karin; A. Hamidy; A. Riyanto
	15393	B	Occidozyga semipalmata				2017-08-25	21:05:00		34		4.46	-1.19694	121.435	27	1602	Primary forest; in crevice on lof fow vertical waterfall			Gunung Katopasa mid-camp	Jimmy McGuire; Jeff Frederick; Benjamin Karin; A. Hamidy; A. Riyanto
	15394	B	Calamaria sp.				2017-08-26	10:17:00		185	23	2.86	-1.18976	121.44		1522	Primary forest; in pitfall bucket in flat area of forest with extensive rattan, pitfall 3			Gunung Katopasa mid-camp	Jimmy McGuire; Jeff Frederick; Benjamin Karin; A. Hamidy; A. Riyanto
	15395	M/B	Rhacophorus edentulus			Tadpole	2017-08-25						-1.19719	121.436	8	1650	Primary forest; collected in shallow pool with just a trickle of water flowing in			Gunung Katopasa mid-camp	Jimmy McGuire; Jeff Frederick; Benjamin Karin; A. Hamidy; A. Riyanto
	15396	M/B	Rhacophorus edentulus			Tadpole	2017-08-25						-1.19719	121.436	8	1650	Primary forest; collected in shallow pool with just a trickle of water flowing in			Gunung Katopasa mid-camp	Jimmy McGuire; Jeff Frederick; Benjamin Karin; A. Hamidy; A. Riyanto
Latitude	15397	M	Eutropis rudis				2017-08-24			50	56 inc.	3.14	-1.14852	121.448		736				Gunung Katopasa Low Camp, Kecamatan Ulu Bonkga, Kabupaten Tojo Una-Una, Provinsi Sulawesi Tengah, Sulawesi Id., Indonesia	Jimmy McGuire; Jeff Frederick; Benjamin Karin; A. Hamidy; A. Riyanto	No throat color
Latitude	15398	M	Eutropis macrophthalma	male			2017-08-24			83	158	19.47	-1.1482	121.448		721				Gunung Katopasa Low Camp, Kecamatan Ulu Bonkga, Kabupaten Tojo Una-Una, Provinsi Sulawesi Tengah, Sulawesi Id., Indonesia	Jimmy McGuire; Jeff Frederick; Benjamin Karin; A. Hamidy; A. Riyanto	Green throat and anterior chest (yellow greenish), no melanic spotting on throat
Latitude	15399	M	Eutropis multifasciata				2017-08-24			61	67 regen.	5.12	-1.14952	121.448		757				Gunung Katopasa Low Camp, Kecamatan Ulu Bonkga, Kabupaten Tojo Una-Una, Provinsi Sulawesi Tengah, Sulawesi Id., Indonesia	Jimmy McGuire; Jeff Frederick; Benjamin Karin; A. Hamidy; A. Riyanto
Latitude	15400	M	Gehyra mutilata	male			2017-08-24			70	78	8.76	-1.14685	121.448		694				Gunung Katopasa Low Camp, Kecamatan Ulu Bonkga, Kabupaten Tojo Una-Una, Provinsi Sulawesi Tengah, Sulawesi Id., Indonesia	Jimmy McGuire; Jeff Frederick; Benjamin Karin; A. Hamidy; A. Riyanto
Latitude	15401	B	Gehyra mutilata	male			2017-08-24			75	62 regen.	10.19	-1.14685	121.448		694				Gunung Katopasa Low Camp, Kecamatan Ulu Bonkga, Kabupaten Tojo Una-Una, Provinsi Sulawesi Tengah, Sulawesi Id., Indonesia	Jimmy McGuire; Jeff Frederick; Benjamin Karin; A. Hamidy; A. Riyanto	All yellow below
Latitude	15402	M	Limnonectes sp. "1"				2017-08-24			37		5.21	-1.14612	121.448		655				Gunung Katopasa Low Camp, Kecamatan Ulu Bonkga, Kabupaten Tojo Una-Una, Provinsi Sulawesi Tengah, Sulawesi Id., Indonesia	Jimmy McGuire; Jeff Frederick; Benjamin Karin; A. Hamidy; A. Riyanto
Latitude	15403	B	Limnonectes sp. "1"				2017-08-24			35		3.66	-1.14612	121.448		655				Gunung Katopasa Low Camp, Kecamatan Ulu Bonkga, Kabupaten Tojo Una-Una, Provinsi Sulawesi Tengah, Sulawesi Id., Indonesia	Jimmy McGuire; Jeff Frederick; Benjamin Karin; A. Hamidy; A. Riyanto
	15404	B	Eutropis macrophthalma	female			2017-08-26	15:35:00		123	173	49.98	-1.18207	121.446	19	1394	Primary forest; on sticky trap 2-21 on horizontal 20" log next to trail			Gunung Katopasa mid-camp	Jimmy McGuire; Jeff Frederick; Benjamin Karin; A. Hamidy; A. Riyanto	Dark yellow ventrally
	15405	B	Sphenomorphus zimmeri	female	Y		2017-08-26	15:15:00		73	133	7.9	-1.1882	121.443		1511	Primary forest; on tree, 1m high, on moss			Gunung Katopasa mid-camp	Jimmy McGuire; Jeff Frederick; Benjamin Karin; A. Hamidy; A. Riyanto
	15406	M	Sphenomorphus zimmeri	male			2017-08-25	08:40:00		73	79 inc.	9.21	-1.18448	121.445	5	1366	Primary forest; on tree, 1.5m above ground			Gunung Katopasa mid-camp	Jimmy McGuire; Jeff Frederick; Benjamin Karin; A. Hamidy; A. Riyanto
	15407	B	Sphenomorphus zimmeri				2017-08-25	10:08:00		52	37 inc.	2.74	-1.18859	121.442		1510	Primary forest; sticky trap			Gunung Katopasa mid-camp	Jimmy McGuire; Jeff Frederick; Benjamin Karin; A. Hamidy; A. Riyanto
	15408	M	Ahaetulla prasina	male			2017-08-26	21:25:00		790	512	25.37	-1.17993	121.447		1366	Primary forest; on 1' diameter log in clearing by camp			Gunung Katopasa mid-camp	Jimmy McGuire; Jeff Frederick; Benjamin Karin; A. Hamidy; A. Riyanto
	15409	B	Sphenomorphus zimmeri	female	Y		2017-08-25	09:15:00		67	119	5.88	-1.18666	121.445		1495	Primary forest; caught on a branch 70cm above trail			Gunung Katopasa mid-camp	Jimmy McGuire; Jeff Frederick; Benjamin Karin; A. Hamidy; A. Riyanto
	15410	M	Sphenomorphus zimmeri	male			2017-08-25	08:54:00		72	112 regen.	7.6	-1.1848	121.445		1432	Primary forest; on ground in sticky trap			Gunung Katopasa mid-camp	Jimmy McGuire; Jeff Frederick; Benjamin Karin; A. Hamidy; A. Riyanto	Reddish orange throat wash
	15411	M	Oreophryne sp.				2017-08-27	20:52:00		17		0.46	-1.18776	121.444	5	1503	Primary forest; 1m off ground on leaf at base of a tree			Gunung Katopasa mid-camp	Jimmy McGuire; Jeff Frederick; Benjamin Karin; A. Hamidy; A. Riyanto
	15412	B	Oreophryne sp.				2017-08-27	21:04:00		14		0.39	-1.18792	121.444	6	1507	Primary forest; 1m off grount on rattan frond			Gunung Katopasa mid-camp	Jimmy McGuire; Jeff Frederick; Benjamin Karin; A. Hamidy; A. Riyanto
	15413	B	Oreophryne sp.				2017-08-27	21:33:00		16		0.52	-1.18912	121.441	5	1499	Primary forest; 1/2m off ground on bamboo leaf			Gunung Katopasa mid-camp	Jimmy McGuire; Jeff Frederick; Benjamin Karin; A. Hamidy; A. Riyanto
	15414	B	Oreophryne sp.				2017-08-27	21:41:00		18		0.6	-1.18912	121.441	5	1499	Primary forest; 1/2m off ground on bamboo leaf			Gunung Katopasa mid-camp	Jimmy McGuire; Jeff Frederick; Benjamin Karin; A. Hamidy; A. Riyanto	Vertical dorsal stripe
	15415	M	Oreophryne sp.	female			2017-08-27	22:52:00		20		0.8	-1.18905	121.441	3	1502	Primary forest; 1m off ground perched on a large leaf			Gunung Katopasa mid-camp	Jimmy McGuire; Jeff Frederick; Benjamin Karin; A. Hamidy; A. Riyanto
Latitude	15416	M	Limnonectes sp. "T Yellow"	female	Y		2017-08-28	20:50:00		46		8.34	-1.1785	121.446	5	1364	3m from stream edge in leaf litter on a steep muddy bank			Gunung Katopasa mid-camp	Jimmy McGuire; Jeff Frederick; Benjamin Karin; A. Hamidy; A. Riyanto	Mottled lip, yellow ventral wash, deep yellow thigh, reduced hind limb webbing, dorsal hindlimb striping, dorsal stripe color morph
Latitude	15417	M	Limnonectes sp. "I"				2017-08-27	20:29:00		133		166.14	-1.17843	121.446		1339	On rock in small stream below mud camp			Gunung Katopasa mid-camp	Jimmy McGuire; Jeff Frederick; Benjamin Karin; A. Hamidy; A. Riyanto
Latitude	15418	M	Polypedates iskandari				2017-08-27	09:50:00		23		0.81	-1.18962	121.441		1494	On Pandanus leaf			Gunung Katopasa mid-camp	Jimmy McGuire; Jeff Frederick; Benjamin Karin; A. Hamidy; A. Riyanto	Tag in bag was T31 not T32
	15419	M	Limnonectes sp. "T Yellow"	male			2017-08-29	20:25:00		44		7.35	-1.17834	121.446	9	1339	In leaf litter 3-4m up steep bank from stream			Gunung Katopasa mid-camp	Jimmy McGuire; Jeff Frederick; Benjamin Karin; A. Hamidy; A. Riyanto	Paired, lateral vocal sacs
	15420	B	Limnonectes sp. "T Yellow"				2017-08-29	20:55:00		46		7.64	-1.17834	121.446	7	1355	In mud/leaf litter 3.5m up steep bank from stream, at base of tree roots			Gunung Katopasa mid-camp	Jimmy McGuire; Jeff Frederick; Benjamin Karin; A. Hamidy; A. Riyanto
	15421	M	Limnonectes sp. "T Yellow"	female			2017-08-29	22:50:00		56		14.59	-1.17821	121.446	6	1339	hiding/burried in moss on log extending from 2m high vertical bank on side of stream			Gunung Katopasa mid-camp	Jimmy McGuire; Jeff Frederick; Benjamin Karin; A. Hamidy; A. Riyanto	Gravid female--egs pastel lime green
Elevation	15422	M	Limnonectes sp. "I"				2017-08-29	21:55:00		117		106.79	-1.17802	121.446	6		On ground 3m up from stream on semi-sloped bank. Clay/mud soil with leaf litter substrate			Gunung Katopasa mid-camp	Jimmy McGuire; Jeff Frederick; Benjamin Karin; A. Hamidy; A. Riyanto
	15423	M	Rhacophorus edentulus				2017-08-29	20:42:00		33		1.76	-1.17826	121.446	8	1339	In tree 2m off the ground, 4m from stream up steep bank			Gunung Katopasa mid-camp	Jimmy McGuire; Jeff Frederick; Benjamin Karin; A. Hamidy; A. Riyanto
	15424	B	Rhacophorus edentulus				2017-08-29	20:42:00		32		1.65	-1.17826	121.446	8	1339	Perched on stick in adjacent tree, 1.5m over from JAM 15423			Gunung Katopasa mid-camp	Jimmy McGuire; Jeff Frederick; Benjamin Karin; A. Hamidy; A. Riyanto
	15425	B	Rhacophorus edentulus				2017-08-29	21:21:00		38		2.29	-1.18379	121.445		1429	In tree, ~9m from ground			Gunung Katopasa mid-camp	Jimmy McGuire; Jeff Frederick; Benjamin Karin; A. Hamidy; A. Riyanto
	15426	M	Rhacophorus edentulus				2017-08-29			34		1.95	-1.17983	121.447	4	1378	captured at Pos 4 mid-campsite			Gunung Katopasa mid-camp	Jimmy McGuire; Jeff Frederick; Benjamin Karin; A. Hamidy; A. Riyanto
	15427	M	Polypedates iskandari				2017-08-29	20:15:00		65		11.24	-1.18934	121.442		1471	Captured in rawa--primary forest sedge swamp			Gunung Katopasa mid-camp	Jimmy McGuire; Jeff Frederick; Benjamin Karin; A. Hamidy; A. Riyanto
	15428	B	Polypedates iskandari				2017-08-29	18:36:00		54		6.98	-1.18954	121.441		1502	Captured in rawa--primary forest sedge swamp; in tree 2m from ground			Gunung Katopasa mid-camp	Jimmy McGuire; Jeff Frederick; Benjamin Karin; A. Hamidy; A. Riyanto
	15429	M	Oreophryne sp.				2017-08-29	18:42:00		18		0.5	-1.18916	121.442		1498				Gunung Katopasa mid-camp	Jimmy McGuire; Jeff Frederick; Benjamin Karin; A. Hamidy; A. Riyanto
	15430	B	Oreophryne sp.				2017-08-29	18:42:00		21		1.02	-1.1893	121.442		1530	1m up from ground			Gunung Katopasa mid-camp	Jimmy McGuire; Jeff Frederick; Benjamin Karin; A. Hamidy; A. Riyanto	Has vertical dorsal stripe
	15431	M	Oreophryne sp.	female			2017-08-29	18:25:00		21		0.72	-1.18915	121.441		1497	30cm from ground--captured by Pos 5			Gunung Katopasa mid-camp	Jimmy McGuire; Jeff Frederick; Benjamin Karin; A. Hamidy; A. Riyanto
	15432	B	Oreophryne sp.				2017-08-29	18:25:00		16		0.5	-1.18915	121.441		1497	30cm from ground--captured by Pos 5			Gunung Katopasa mid-camp	Jimmy McGuire; Jeff Frederick; Benjamin Karin; A. Hamidy; A. Riyanto
	15433	B	Oreophryne sp.				2017-08-29	20:36:00		15		0.31	-1.18878	121.442		1514	1.5m from gound			Gunung Katopasa mid-camp	Jimmy McGuire; Jeff Frederick; Benjamin Karin; A. Hamidy; A. Riyanto
	15434	M	Oreophryne sp.	male			2017-08-29	20:36:00		16		0.52	-1.18878	121.442		1514	1m from ground			Gunung Katopasa mid-camp	Jimmy McGuire; Jeff Frederick; Benjamin Karin; A. Hamidy; A. Riyanto
	15435	B	Oreophryne sp.				2017-08-29	18:42:00		18		0.58	-1.18916	121.442		1498	on leaf, 1m from ground			Gunung Katopasa mid-camp	Jimmy McGuire; Jeff Frederick; Benjamin Karin; A. Hamidy; A. Riyanto
	15436	B	Oreophryne sp.				2017-08-29	20:38:00		17		0.58	-1.18878	121.442		1514	In pitfall line (Rizaldi) at Pos 3			Gunung Katopasa mid-camp	Jimmy McGuire; Jeff Frederick; Benjamin Karin; A. Hamidy; A. Riyanto
Latitude	15437	M	Sphenomorphus zimmeri	male			2017-08-30	14:00:00		68	127 inc.	6.66			6					Gunung Katopasa mid-camp	Jimmy McGuire; Jeff Frederick; Benjamin Karin; A. Hamidy; A. Riyanto
	15438	B	Occidozyga semipalmata	female			2017-08-30	21:26:00		33		3.75	-1.17834	121.446	7	1339	At water's edge , 2cm deep water, mud/rock substrate			Gunung Katopasa mid-camp	Jimmy McGuire; Jeff Frederick; Benjamin Karin; A. Hamidy; A. Riyanto
	15439	B	Limnonectes sp. "T Yellow"	male			2017-08-30	22:10:00		40		5.66	-1.17804	121.446	6	1335	4m from stream, 1m high steep vertical bank, 3m up slope, hiding in leaf litter			Gunung Katopasa mid-camp	Jimmy McGuire; Jeff Frederick; Benjamin Karin; A. Hamidy; A. Riyanto
	15440	B	Rhacophorus edentulus				2017-08-30	20:22:00		40		3.38	-1.1837	121.445		1413	on tree, calling from 8m up			Gunung Katopasa mid-camp	Jimmy McGuire; Jeff Frederick; Benjamin Karin; A. Hamidy; A. Riyanto	R. edentulus gravid female. Eggs pastel lime green
	15441	M	Rhacophorus edentulus				2017-08-30	20:48:00		32		1.57	-1.18153	121.446		1382	on tree, 4m up from ground			Gunung Katopasa mid-camp	Jimmy McGuire; Jeff Frederick; Benjamin Karin; A. Hamidy; A. Riyanto
Latitude	15442	M	Sphenomorphus zimmeri	male						64	26 inc.	5.85								Gunung Katopasa mid-camp	Jimmy McGuire; Jeff Frederick; Benjamin Karin; A. Hamidy; A. Riyanto
Latitude	15443	M	Sphenomorphus zimmeri	female	Y					71	134	7.03								Gunung Katopasa mid-camp	Jimmy McGuire; Jeff Frederick; Benjamin Karin; A. Hamidy; A. Riyanto
	15444	M	Sphenomorphus zimmeri	male			2017-08-31	21:00:00		74	167	9.41	-1.17907	121.45	6	1471	Next to trail in between pos 3 and pos 4			Gunung Katopasa mid-camp	Jimmy McGuire; Jeff Frederick; Benjamin Karin; A. Hamidy; A. Riyanto
	15445	B	Limnonectes sp. "G2"	female			2017-09-02			60		16.45	-1.14635	121.448	5	670	Brought by local person from kampung			Gunung Katopasa Pos 1	Jimmy McGuire; Jeff Frederick; Benjamin Karin; A. Hamidy; A. Riyanto
	15446	B	Duttaphrynus melanostictus	female	Y		2017-09-02			78		37.15	-1.14952	121.448	5	765				Gunung Katopasa Pos 2	Jimmy McGuire; Jeff Frederick; Benjamin Karin; A. Hamidy; A. Riyanto
	15447	B	Calamaria brongersmai	female			2017-09-02			192	11	2.65	-1.14635	121.448	5	670	Kebun--found on trail at pos 1			Gunubg Katopasa Pos 1	Jimmy McGuire; Jeff Frederick; Benjamin Karin; A. Hamidy; A. Riyanto
	15448	M	Occidozyga semipalmata				2017-09-02			29		2.71	-1.19765	121.44		1639				Gunung Katopasa mid-camp	Jimmy McGuire; Jeff Frederick; Benjamin Karin; A. Hamidy; A. Riyanto
	15449	M	Occidozyga semipalmata				2017-09-02			26		1.91	-1.19765	121.44		1639				Gunung Katopasa mid-camp	Jimmy McGuire; Jeff Frederick; Benjamin Karin; A. Hamidy; A. Riyanto
	15450	B	Occidozyga semipalmata				2017-09-02			37		5.53	-1.19765	121.44		1639				Gunung Katopasa mid-camp	Jimmy McGuire; Jeff Frederick; Benjamin Karin; A. Hamidy; A. Riyanto
	15451	M	Occidozyga semipalmata				2017-09-02			36		5.05	-1.19765	121.44		1639				Gunung Katopasa mid-camp	Jimmy McGuire; Jeff Frederick; Benjamin Karin; A. Hamidy; A. Riyanto
	15452	B	Occidozyga semipalmata				2017-09-02			33		3.48	-1.19765	121.44		1639				Gunung Katopasa mid-camp	Jimmy McGuire; Jeff Frederick; Benjamin Karin; A. Hamidy; A. Riyanto
	15453	B	Sphenomorphus zimmeri				2017-09-02	14:10:00		76	143	9.48	-1.18847	121.439	6	1492	Primary forest; on sticky trap 3-11 on 1' diameter log on ground			Gunung Katopasa mid-camp	Jimmy McGuire; Jeff Frederick; Benjamin Karin; A. Hamidy; A. Riyanto
	15454	B	Oreophryne sp.				2017-09-02	23:35:00		19		0.63	-1.19326	121.439	13	1588	Primary montane forest; on leaf 0.6m up			Gunung Katopasa mid-camp	Jimmy McGuire; Jeff Frederick; Benjamin Karin; A. Hamidy; A. Riyanto
	15455	M	Oreophryne sp.				2017-09-03	21:00:00		18		0.66	-1.18889	121.442	5	1492	Primary montane forest; on leaf stem 2.2m up			Gunung Katopasa mid-camp	Jimmy McGuire; Jeff Frederick; Benjamin Karin; A. Hamidy; A. Riyanto
	15456	M	Eutropis macrophthalma	male			2017-09-03	16:40:00		128	215	57.99	-1.18854	121.442	12	1511	Primary montane forest; on sticky trap 3-14 under tree roots/trunk 48" dbh			Gunung Katopasa mid-camp	Jimmy McGuire; Jeff Frederick; Benjamin Karin; A. Hamidy; A. Riyanto
	15457	B	Cylindrophis melanotus	male			2017-09-03	15:00:00	15:30:00	325	9	17.74	-1.14952	121.448		756	Selectively logged forest; under 1'x1' rock at pos 2			Gunung Katopasa Pos 2	Jimmy McGuire; Jeff Frederick; Benjamin Karin; A. Hamidy; A. Riyanto
	15458	B	Dendrelaphis marenae				2017-09-04	08:45:00		293	159	3.3	-1.18173	121.446	5	1356	Primary forest; on ground next to 1m wide mud bottom stream; sticky 2-22 small clearing			Gunung Katopasa mid-camp	Jimmy McGuire; Jeff Frederick; Benjamin Karin; A. Hamidy; A. Riyanto
	15459	M	Calamaria brongersmai				2017-09-04			173	18	3.04	-1.12615	121.458	25	273				Gunung Katopasa Low Camp, Kecamatan Ulu Bonkga, Kabupaten Tojo Una-Una, Provinsi Sulawesi Tengah, Sulawesi Id., Indonesia	Jimmy McGuire; Jeff Frederick; Benjamin Karin; A. Hamidy; A. Riyanto
	15460	B	Cuora amboinensis				2017-09-02					341.1	-1.13727	121.444	9	418	in kolam/rawa 4-6" deep, mud bottom			Gunung Katopasa Low Camp, Kecamatan Ulu Bonkga, Kabupaten Tojo Una-Una, Provinsi Sulawesi Tengah, Sulawesi Id., Indonesia	Jimmy McGuire; Jeff Frederick; Benjamin Karin; A. Hamidy; A. Riyanto
	15461	B	Xenopeltis unicolor	female						689	70	260.33	-1.138	121.452	10	440	Corn field			Gunung Katopasa Low Camp, Kecamatan Ulu Bonkga, Kabupaten Tojo Una-Una, Provinsi Sulawesi Tengah, Sulawesi Id., Indonesia	Jimmy McGuire; Jeff Frederick; Benjamin Karin; A. Hamidy; A. Riyanto
	15462	M	Limnonectes sp. "1"				2017-09-02	17:39:00		31		3.25	-1.14909	121.448	4	738	Kebun; on rocky/mud substrate 1' from 0.5m wide seep			Gunung Katipasa Pos 2	Jimmy McGuire; Jeff Frederick; Benjamin Karin; A. Hamidy; A. Riyanto
	15463	B	Limnonectes sp. "G2"				2017-09-02	18:01:00		49		9.19	-1.1461	121.448	2	650	Kebun; on trail where 0.5m wide stream crosses, in water			Gunung Katipasa Pos 2	Jimmy McGuire; Jeff Frederick; Benjamin Karin; A. Hamidy; A. Riyanto
	15464	B	Limnonectes sp. "1"	male			2017-09-02	17:39:00		36		4.81	-1.14909	121.452	4	738	Kebun; on rocky/mud substrate 1' from 0.5m wide seep			Gunung Katipasa Pos 2	Jimmy McGuire; Jeff Frederick; Benjamin Karin; A. Hamidy; A. Riyanto	Jeff videoed while it was calling
not collected	-	-	Lamprolepis smaragdina													375	Vicinity of low camp
not collected	-	-	Papurana celebensis													375	Vicinity of low camp
not collected	-	-	Varanus salvator													375	Vicinity of low camp
not collected	-	-	Ptyas dipsas													1471	Sedge swamp

## Sheet: Pivot Table 1
Genus species	COUNTA of Genus species	MIN of Elevation	MAX of Elevation	MIN of SVL (mm)
Ahaetulla prasina	3	293	1366	685
Boiga irregularis	1	384	384	1566
Calamaria brongersmai	2	273	670	173
Calamaria sp.	1	1522	1522	185
Chalcorana mocquardi	1	365	365	45
Chrysopelea paradisi	2	210	402	515
Cuora amboinensis	1	418	418
Cylindrophis melanotus	1	756	756	325
Cyrtodactylus jellesmae	6	318	757	53
Cyrtodactylus sp.	4	282	482	46
Dendrelaphis marenae	1	1356	1356	293
Dibamus sp.	1	301	301	142
Draco beccarii	3	365	441	64
Duttaphrynus melanostictus	3	262	765	78
Emoia caeruleocauda	2	352	352	56
Eutropis macrophthalma	5	721	1511	65
Eutropis multifasciata	4	339	757	61
Eutropis rudis	18	283	736	33
Gehyra mutilata	2	694	694	70
Hemidactylus frenatus	1	283	283	44
Hypsiscopus plumbea	1	381	381	336
Ingerophrynus biporcatus	1	296	296	31
Ingerophrynus celebensis	2	276	409	16
Kaloula baleata	3	297	434	49
Limnonectes sp. "1"	15	377	738	25
Limnonectes sp. "G2"	12	280	670	45
Limnonectes sp. "I"	18	261	1339	14
Limnonectes sp. "T Yellow"	5	1335	1364	40
Lipinia infralineolata	2	331	381	41
Occidozyga semipalmata	11	1339	1639	19
Oligodon tolaki	1	381	381	273
Ophiophagus hannah	1	409	409
Oreophryne sp.	25	1375	1588	14
Polypedates iskandari	7	347	1502	23
Psammodynastes pulverulentus	3	305	358	296
recording error no specimen	2
Rhabdophis chrysargoides	1	1490	1490	619
Rhacophorus boeadi	25	1471	1521	21
Rhacophorus edentulus	17	1276	1650	32
Shed snake skin (tissue only)	1	302	302
Sphenomorphus tropidonotus	10	364	420	35
Sphenomorphus variegatus	8	346	461	29
Sphenomorphus zimmeri	21	1366	1581	31
Tropidolaemus subannulatus	1	418	418	444
Tytthoscincus sp.	7	352	1100	31
Xenochrophis trianguligerus	1	526	526	763
Xenopeltis unicolor	1	440	440	689
Grand Total	264	210	1650	14

## Sheet: swab
HR ID	Field ID	JAM	MVZ (M) or MZB (B)	species	date	hour	sex	Vegetation	horizontal position	vertical position	substrate	SVL	weiht	long	lat	elevation	elevation error	infection detected	qty Bd	ZE score
	JKT33	15439	B	Limnonectes sp.1	Aug 30th		male					40	5.66	121.446	1.17804	1335	6
	JKT26	15419	M	Limnonectes sp.1	Aug 29th		male					44	7.35	121.446	1.17834	1339	9
	JKT32	15438	B	Occidozyga semipalmata	Aug 30th		female					33	3.75	121.446	1.17834	1339	7
	JKT31	15421	M	Limnonectes sp.1	Aug 29th		female					56	14.59	121.446	1.17821	1339	6
	JKT25	15416	M	Limnonectes sp.1	Aug 28th		female					46	8.34	121.446	1.1785	1364	5
	KP71	15349	M	Polypedates iskandari	Aug 23rd							59	11.48	121.441	1.1894	1472	6
	KP57	15339	B	Rhacophorus	Aug 21st		male					46	3.98	121.441	1.18945	1486	5
	KP55	15337	M	Rhacophorus	Aug 21st		male					49	5.38	121.441	1.18945	1486	5
	KP56	15338	M	Rhacophorus	Aug 21st		male					45	3.53	121.441	1.18945	1486	5
	KP51	15334	B	Rhacophorus	Aug 21st		male					46	3.98	121.442	1.18931	1490	6
	KP52	15335	M	Rhacophorus	Aug 21st		male					48	4.84	121.442	1.18931	1490	6
	KP48	15331	B	Rhacophorus	Aug 21st		male					45	3.87	121.442	1.18931	1490	6
	KP49	15332	B	Rhacophorus	Aug 21st		female					60	7.69	121.442	1.18931	1490	6
	KP50	15333	M	Rhacophorus	Aug 21st		male					47.5	4.23	121.442	1.18931	1490	6
	KP73	15354	M	Oreophryne	Aug 23th							19	0.6	121.441	1.18894	1490	4
	KP58	15347	B	Rhacophorus	Aug 21st							21	0.67	121.442	1.18852	1499	7
	KP46	15350	B	Oreophryne	Aug 21st		female					19	0.67	121.442	1.18852	1499	7
	KP47	15351	M	Oreophryne	Aug 21st		female					19	0.76	121.442	1.18852	1499	7
	KP54	15336	M	Polypedates iskandari	Aug 21st							23	0.95	121.442	1.1894	1498	5
	JKT22	15413	B	Oreophryne	Aug 27th							16	0.52	121.441	1.18912	1499	5
	JKT23	15414	B	Oreophryne	Aug 27th							18	0.6	121.441	1.18912	1499	5
	JKT24	15415	M	Oreophryne	Aug 27th		female					20	0.8	121.441	1.18905	1502	3
	JKT20	15411	M	Oreophryne	Aug 27th							17	0.46	121.444	1.18776	1503	5
	JKT21	15412	B	Oreophryne	Aug 27th							14	0.39	121.444	1.18792	1507	6
	JKT12	15362	M	Rhacophorus	Aug 22nd		female					61	8.12	121.442	1.18935	1513	4
	JKT11	15361	B	Rhacophorus	Aug 22nd		male					48	4.95	121.442	1.18941	1521	5
	JKT10	15360	B	Rhacophorus	Aug 22nd		female					56	7.35	121.442	1.18941	1521	5
	KP85	15392	B	Occidozyga semipalmata	Aug 25th							28	2.7	121.434	1.19681	1577	38
	KP86	15393	B	Occidozyga semipalmata	Aug 25th							34	4.46	121.435	1.19694	1602	27
	KP83	15390	M	Occidozyga semipalmata	Aug 25th							30	3.48	121.435	1.197	1620	24
	JKT82	15389	M	Occidozyga semipalmata	Aug 25th							32	3.94	121.435	1.19699	1627	15
	KP81	15388	M	Rhacophorus edentulus	Aug 25th							34	1.74	121.436	1.19719	1650	8
	KP2	15202	M	Limnonectes sp. "I"	Aug 14th							85	44.3	121.458	1.12628	261	3
	KP3	15203	B	Limnonectes sp. "I"	Aug 14th							91	56.21	121.449	1.12813	262	3
	KP16	15226	B	Duttaphrynus melanostictus	Aug 15th							91	51.5	121.449	1.12784	262	3
	KP17	15227	M	Duttaphrynus melanostictus	Aug 15th							95	57.29	121.449	1.12784	262	3
	KP13	15221	B	Limnonectes modestus	Aug 15th							57	14.97	121.444	1.12988	285	10
	KP14	15222	B	Limnonectes sp. "I"	Aug 15th							37	4.22	121.444	1.12988	285	10
	JKT4	15269	B	Limnonectes sp. "I"	Aug 17th							117	126.63	121.442	1.1308	334	50
	JKT7	15310	B	Kaloula baleata	Aug 19th							49	9.96	121.444	1.1298	297	3
	JKT6	15309	M	Ingerophrynus celebensis	Aug 18th		female					80	29.86	121.438	1.13218	297	3
	KP18	15223	B	Limnonectes sp. "I"	Aug 15th							103	83.82	121.444	1.12997	319	6
	KP6	15206	B	Limnonectes modestus	Aug 14th							48	9.11	121.441	1.1317	320	6
	KP38	15239	B	Limnonectes sp. "I"	Aug 16th							118	126.28	121.444	1.12992	329	7
	KP19	15224	M	Limnonectes sp. "I"	Aug 15th							48	9.17	121.442	1.13052	327	3
	KP30	15238	B	Limnonectes sp. "I"	Aug 16th							130	168.4	121.441	1.1318	354	7
	KP44	15300	M	Kaloula baleata	Aug 18th							52	12.24	121.438	1.13227	371	6
	JKT1	15270	B	Limnonectes sp.1	Aug 14th		female					42	6.82	121.438	1.13213	377	5
	KP29	15236	M	Limnonectes modestus	Aug 16th							45	8.39	121.438	1.13218	375	3
	JKT3	15258	B	Eutropis rudis	Aug 16th		male					82	13.19	121.444	1.13717	391	10
	KP34	15241	M	Limnonectes sp.1	Aug 16th		male					39	4.74	121.444	1.13727	418	9
	KP33	15240	B	Limnonectes sp.1	Aug 16th							38	4.15	121.444	1.13727	418	9
	KP35	15242	M	Limnonectes sp.1	Aug 16th		male					36	3.73	121.444	1.13727	418	9
	KP36	15243	M	Limnonectes modestus	Aug 16th							53	12.41	121.444	1.13727	418	9
	X	15311	B	Kaloula baleata	Aug 19th							65	27.47	121.437	1.13203	434	8
	MR7	15345	B	Rhacophorus edentulus	Aug 19th							33	1.69	121.446	1.1821	1399
	MR6	15344	M	Rhacophorus edentulus	Aug 19th							32	1.67	121.446	1.1818	1382
	MR5	15343	B	Rhacophorus edentulus	Aug 19th							33	1.69	121.446	1.18171	1364
	MR16	15330	B	Rhacophorus	Aug 21st		female					55	7.23	121.442	1.18934	1471
	MR15	15329	M	Rhacophorus	Aug 21st		male					45	4	121.442	1.18934	1471
	T20	15306	B	Polypedates iskandari	Aug 18th							60	10.01	121.441	1.13141	347
	TR36	15427	M	Polypedates iskandari	Aug 29th							65	11.24	121.442	1.18934	1471
	TR41	15428	B	Polypedates iskandari	Aug 29th							54	6.98	121.441	1.18954	1502
	JKT13	15359	M	Oreophryne	Aug 22th		female					18	0.57	121.442	1.18941	1513
	TO7	15252	B	Limnonectes sp.1	Aug 16th							32	2..74	121.261	1.08056	482
	TO8	15253	M	Limnonectes sp.1	Aug 16th							35	3.83	121.261	1.08056	482
	T31B	13403		Limnonectes sp.1	Aug 24th							35	3.66	121.279	1.08767	655
	T31A	15402		Limnonectes sp.1	Aug 24th							37	5.21	121.269	1.08767	655
	BK9D	15262		Limnonectes sa	Aug 16th							25	1.6	121.262	1.0814	532
	BK9C	15261		Limnonectes sp. "I"	Aug 16th							42	8.15	121.262	1.0814	532
	BK9A	15259		Limnonectes sp. "I"	Aug 16th							29	2.08	121.262	1.0814	532
	BK9B	15260		Limnonectes sp. "I"	Aug 16th							85	42.82	121.262	1.0814	532
	KP38	15239		Limnonectes sp. "I"	Aug 16th							118	126.28
	T33	15417		Limnonectes sp. "I"	Aug 27th							133	166.14			1339
	T14A	15290		Ingerophrynus celebensis	Aug 18th							16	0.33			276
	AMIAW	15299		Chalcorana mocquardi	Aug 18th		male					45	4.48			364
